# Supplementary material
Source: publisher figshare collection journal article supplement (https://gsajournals.figshare.com/ndownloader/files/32118707)
Supplement: Supplementary file 1 [file 32118707]

## Sheet: Table S6
The blood cis-mQTLs detected in replication cohort with 780 adult African American samples
SNP	gene	beta	t-stat	p-value
rs301806	cg14004768	0.14	79.24	0
rs301806	cg16484858	0.18	88.27	0
rs301807	cg14004768	0.14	80.54	0
rs301807	cg16484858	0.18	89.74	0
rs301802	cg14004768	0.14	79.72	0
rs301802	cg16484858	0.18	88.13	0
rs301806	cg19465883	0.19	79.14	0
rs301807	cg19465883	0.19	81.31	0
rs301802	cg19465883	0.19	80.39	0
rs10917504	cg12097634	0.18	83.3	0
rs925826	cg20704162	-0.13	-64.12	0
rs4920322	cg25172338	-0.17	-64.92	0
rs4920323	cg25172338	-0.17	-64.85	0
rs6426775	cg24354335	-0.17	-71.31	0
rs925826	cg24354335	-0.17	-77.53	0
rs9727883	cg18352985	-0.17	-64.3	0
rs9727884	cg18352985	-0.17	-64.3	0
rs679591	cg26491092	0.16	67.49	0
rs681395	cg26491092	0.16	67.02	0
rs643492	cg26491092	0.16	67.49	0
rs2806556	cg26491092	0.16	68.06	0
rs1738467	cg26491092	0.16	71.57	0
rs2806564	cg26491092	0.16	71.57	0
rs35630915	cg26491092	0.16	71.57	0
rs2806565	cg26491092	0.16	71.57	0
rs1757040	cg26491092	0.16	71.57	0
rs2868573	cg26491092	0.16	71.57	0
rs9426692	cg26491092	0.16	71.57	0
rs1757039	cg26491092	0.16	71.57	0
rs1612905	cg26491092	0.16	71.6	0
rs2776815	cg26491092	0.16	71.6	0
rs1738468	cg26491092	0.16	71.6	0
rs2306626	cg06917450	0.27	80.87	0
rs3762352	cg06917450	0.27	80.87	0
rs3762354	cg06917450	0.27	79.75	0
rs2306625	cg06917450	0.27	79.75	0
rs12038445	cg06917450	0.27	79.52	0
rs10908370	cg06917450	0.27	76.91	0
rs4653321	cg06917450	0.26	73.45	0
rs57669144	cg06917450	0.27	76.79	0
rs11264090	cg06917450	0.27	76.79	0
rs3748679	cg06917450	0.27	76.79	0
rs7526362	cg06917450	0.27	76.79	0
rs11264091	cg06917450	0.27	75.07	0
rs9329570	cg14087524	-0.24	-96.1	0
rs7524477	cg06113552	-0.23	-77.64	0
rs12756825	cg05631519	0.18	78.11	0
rs1499678	cg05631519	0.18	78.11	0
rs1392141	cg05631519	0.18	77.02	0
rs61779295	cg04863005	-0.28	-67.36	0
rs61779296	cg04863005	-0.28	-67.36	0
rs7524477	cg16646600	-0.2	-83.42	0
rs2647395	cg17737388	-0.2	-65.15	0
rs59960594	cg23505604	0.23	70.63	0
rs12069420	cg23505604	0.23	72.62	0
rs12084043	cg23505604	0.23	73.32	0
rs7525008	cg23505604	0.23	82.54	0
rs11165104	cg23505604	0.23	73.74	0
rs11165105	cg23505604	0.23	82.55	0
rs722296	cg23505604	0.22	70.81	0
rs28613199	cg23505604	0.23	73.1	0
rs7530160	cg23505604	0.22	69.77	0
rs140323149	cg23505604	0.22	67.12	0
rs7548951	cg23505604	0.22	67.12	0
rs11165111	cg23505604	0.23	80.53	0
rs58466782	cg23505604	0.23	73.04	0
rs12090491	cg23505604	0.22	67.12	0
rs17111360	cg23505604	0.22	66.93	0
rs11587699	cg23505604	0.23	79.82	0
rs12090310	cg23505604	0.22	68.45	0
rs12096115	cg23505604	0.23	78.27	0
rs10923879	cg16322792	-0.25	-64.39	0
rs10802124	cg16322792	-0.25	-65.3	0
rs3748711	cg16322792	-0.25	-63.74	0
rs7552885	cg16322792	-0.25	-63.74	0
rs3795662	cg16322792	-0.25	-65.3	0
rs3795663	cg16322792	-0.25	-65.3	0
rs16836320	cg13983884	0.28	72.6	0
rs72700229	cg13983884	0.27	64.51	0
rs56318331	cg13983884	0.28	65.05	0
rs6677965	cg01427815	0.23	87.27	0
rs6678380	cg01427815	0.23	86.88	0
rs34800847	cg01427815	0.22	65.79	0
rs351449	cg21501207	0.3	69.91	0
rs2680923	cg21501207	0.31	104.57	0
rs164130	cg21501207	0.3	68.6	0
rs164129	cg21501207	0.31	107.08	0
rs164128	cg21501207	0.3	93.61	0
rs164408	cg21501207	0.3	70.29	0
rs164409	cg21501207	0.3	92.19	0
rs164412	cg21501207	0.3	92.19	0
rs164414	cg21501207	0.3	92.19	0
rs164582	cg21501207	0.3	68.8	0
rs164415	cg21501207	0.29	72.28	0
rs35164209	cg02605540	-0.44	-117.03	0
rs34900680	cg02605540	-0.43	-88.71	0
rs71524966	cg02605540	-0.44	-110.04	0
rs67990281	cg02605540	-0.44	-105.46	0
rs36011221	cg02605540	-0.43	-69.75	0
rs72747939	cg02605540	-0.43	-68.28	0
rs35557925	cg02605540	-0.43	-64.87	0
rs34944273	cg02605540	-0.43	-64.87	0
rs3002297	cg06068545	0.37	174.98	0
rs1219658	cg08325928	0.24	64.73	0
rs2615799	cg08325928	0.24	63.69	0
rs2377029	cg08325928	0.24	64.73	0
rs2377028	cg08325928	0.24	64.73	0
rs2169567	cg08325928	0.24	66.24	0
rs6605032	cg08325928	0.24	66.24	0
rs2889537	cg08325928	0.24	65.27	0
rs9729447	cg08325928	0.24	64.2	0
rs10915964	cg08325928	0.24	63.89	0
rs10127970	cg08325928	0.24	63.9	0
rs10799347	cg08325928	0.24	64.23	0
rs2126578	cg08325928	0.24	63.9	0
rs2254723	cg08325928	0.24	63.9	0
rs1417766	cg08325928	0.24	63.9	0
rs1204007	cg11323295	0.25	71.17	0
rs7594094	cg12880874	-0.27	-75.11	0
rs1031478	cg17052675	-0.36	-73.97	0
rs10200764	cg17052675	-0.36	-74.61	0
rs10205540	cg17052675	-0.36	-74.61	0
rs7573161	cg22708768	0.19	68.96	0
rs1723175	cg10326673	0.45	106.23	0
rs13426316	cg10326673	0.45	129.49	0
rs2949682	cg10326673	0.45	129.49	0
rs1662955	cg10326673	0.44	104.47	0
rs1662949	cg10326673	0.44	103.97	0
rs2462562	cg10326673	0.44	101.31	0
rs1662944	cg10326673	0.44	104.13	0
rs1723170	cg10326673	0.44	104.13	0
rs201489919	cg10326673	0.44	104.13	0
rs1662942	cg10326673	0.44	104.13	0
rs1662941	cg10326673	0.44	102.82	0
rs1723168	cg10326673	0.44	97.42	0
rs1723156	cg10326673	0.44	104.13	0
rs1662958	cg10326673	0.44	101.68	0
rs1614348	cg10326673	0.44	101.68	0
rs1616259	cg10326673	0.44	92.46	0
rs4952124	cg10326673	0.44	101.68	0
rs829584	cg10326673	0.44	99.24	0
rs829579	cg10326673	0.44	101.68	0
rs829577	cg10326673	0.43	64.09	0
rs829576	cg10326673	0.43	64.09	0
rs829573	cg10326673	0.44	99.24	0
rs829571	cg10326673	0.44	101.68	0
rs829570	cg10326673	0.44	101.68	0
rs829562	cg10326673	0.44	99.24	0
rs2692041	cg10326673	0.44	99.24	0
rs829645	cg10326673	0.44	99.24	0
rs829687	cg10326673	0.44	99.24	0
rs829686	cg10326673	0.44	99.24	0
rs1723167	cg10326673	0.44	99.24	0
rs829651	cg10326673	0.44	99.24	0
rs829650	cg10326673	0.44	99.24	0
rs829649	cg10326673	0.44	99.24	0
rs829648	cg10326673	0.44	99.24	0
rs829647	cg10326673	0.44	99.24	0
rs829658	cg10326673	0.44	99.24	0
rs829636	cg10326673	0.44	92.79	0
rs829638	cg10326673	0.44	96.16	0
rs1252639	cg10326673	0.44	101.42	0
rs1252641	cg10326673	0.44	97.11	0
rs1252643	cg10326673	0.44	97.11	0
rs1252647	cg10326673	0.44	96.42	0
rs829623	cg10326673	0.44	101.42	0
rs11686191	cg10326673	0.44	99.24	0
rs7562645	cg10326673	0.44	99.24	0
rs4952148	cg10326673	0.44	97.71	0
rs28538173	cg10326673	0.44	97.71	0
rs10185817	cg16301246	0.18	64.55	0
rs7573740	cg16301246	0.18	63.83	0
rs6545927	cg16301246	0.18	65.92	0
rs1723175	cg15652532	0.45	109.02	0
rs13426316	cg15652532	0.45	134.81	0
rs2949682	cg15652532	0.45	134.81	0
rs1662955	cg15652532	0.44	106.11	0
rs1662949	cg15652532	0.44	105.47	0
rs2462562	cg15652532	0.44	102.67	0
rs1662944	cg15652532	0.44	105.73	0
rs1723170	cg15652532	0.44	105.73	0
rs201489919	cg15652532	0.44	105.73	0
rs1662942	cg15652532	0.44	105.73	0
rs1662941	cg15652532	0.44	104.27	0
rs1723168	cg15652532	0.44	98.72	0
rs1723156	cg15652532	0.44	105.73	0
rs1662958	cg15652532	0.44	103.16	0
rs1614348	cg15652532	0.44	103.16	0
rs1616259	cg15652532	0.43	93.49	0
rs4952124	cg15652532	0.44	103.16	0
rs829584	cg15652532	0.44	99.48	0
rs829579	cg15652532	0.44	103.16	0
rs829577	cg15652532	0.43	64.2	0
rs829576	cg15652532	0.43	64.2	0
rs829573	cg15652532	0.44	99.48	0
rs829571	cg15652532	0.44	103.16	0
rs829570	cg15652532	0.44	103.16	0
rs829562	cg15652532	0.44	100.06	0
rs2692041	cg15652532	0.44	100.06	0
rs829645	cg15652532	0.44	100.06	0
rs829687	cg15652532	0.44	100.06	0
rs829686	cg15652532	0.44	100.06	0
rs1723167	cg15652532	0.44	100.06	0
rs829651	cg15652532	0.44	100.06	0
rs829650	cg15652532	0.44	100.06	0
rs829649	cg15652532	0.44	100.06	0
rs829648	cg15652532	0.44	100.06	0
rs829647	cg15652532	0.44	100.06	0
rs829658	cg15652532	0.44	100.06	0
rs829636	cg15652532	0.43	92.89	0
rs829638	cg15652532	0.43	95.96	0
rs1252639	cg15652532	0.44	102.66	0
rs1252641	cg15652532	0.43	97.55	0
rs1252643	cg15652532	0.43	97.55	0
rs1252647	cg15652532	0.43	96.99	0
rs829623	cg15652532	0.44	102.66	0
rs11686191	cg15652532	0.44	100.06	0
rs7562645	cg15652532	0.44	100.06	0
rs4952148	cg15652532	0.44	98.37	0
rs28538173	cg15652532	0.44	98.37	0
rs62141143	cg20004147	0.45	98.36	0
rs17536001	cg20004147	0.45	94.84	0
rs12469359	cg20004147	0.45	76.77	0
rs11899808	cg20004147	0.45	78.61	0
rs11884967	cg20004147	0.45	89.42	0
rs6756342	cg12808797	0.27	68.25	0
rs6714363	cg12808797	0.27	68.25	0
rs17579744	cg23687206	0.18	75.01	0
rs7569121	cg23687206	0.18	73.71	0
rs72847853	cg23687206	0.18	69.97	0
rs3755265	cg03938978	-0.27	-82.26	0
rs4479442	cg03938978	-0.27	-76.42	0
rs2058659	cg03938978	-0.27	-82.26	0
rs6734762	cg03938978	-0.26	-65.32	0
rs11465721	cg03938978	-0.26	-68.68	0
rs935394	cg00435273	0.32	82.01	0
rs34634082	cg00435273	0.32	79.66	0
rs114130557	cg06888826	-0.27	-89.62	0
rs145561280	cg06888826	-0.27	-89.62	0
rs72979359	cg06888826	-0.27	-88.58	0
rs72979360	cg06888826	-0.27	-89.62	0
rs72979363	cg06888826	-0.27	-80.61	0
rs10168422	cg06888826	-0.27	-89.62	0
rs10200899	cg06888826	-0.27	-89.62	0
rs10168506	cg06888826	-0.27	-89.62	0
rs10168927	cg06888826	-0.27	-89.62	0
rs12465713	cg06888826	-0.27	-89.62	0
rs10168940	cg06888826	-0.27	-79.63	0
rs12465763	cg06888826	-0.27	-89.62	0
rs7561966	cg06888826	-0.27	-89.62	0
rs7564909	cg06888826	-0.27	-88.48	0
rs7564793	cg06888826	-0.27	-89.62	0
rs3845665	cg06888826	-0.27	-80.61	0
rs3845666	cg06888826	-0.27	-87.51	0
rs3845667	cg06888826	-0.27	-87.51	0
rs3907871	cg06888826	-0.27	-77.9	0
rs3907872	cg06888826	-0.27	-80.2	0
rs3907873	cg06888826	-0.27	-90.84	0
rs3907874	cg06888826	-0.27	-89.12	0
rs4270301	cg06888826	-0.27	-89.12	0
rs17048740	cg06888826	-0.27	-89.13	0
rs41361146	cg06888826	-0.27	-89.13	0
rs72979381	cg06888826	-0.27	-89.13	0
rs72979383	cg06888826	-0.27	-89.13	0
rs75761427	cg06888826	-0.27	-89.13	0
rs41501849	cg06888826	-0.27	-87.56	0
rs13400485	cg06888826	-0.27	-89.13	0
rs13397754	cg06888826	-0.27	-89.13	0
rs6707495	cg06888826	-0.27	-88.1	0
rs6722639	cg06888826	-0.27	-78.77	0
rs6725969	cg06888826	-0.27	-83.16	0
rs72979396	cg06888826	-0.27	-83.16	0
rs72979399	cg06888826	-0.27	-83.16	0
rs79777620	cg06888826	-0.27	-83.16	0
rs113173835	cg06888826	-0.27	-80.34	0
rs111556297	cg06888826	-0.27	-79.55	0
rs111332182	cg06888826	-0.27	-83.16	0
rs111931696	cg06888826	-0.27	-81.82	0
rs75369318	cg06888826	-0.27	-76.62	0
rs74451983	cg06888826	-0.27	-76.62	0
rs13025717	cg14317533	-0.29	-69.97	0
rs13025765	cg14317533	-0.29	-69.97	0
rs12618593	cg14317533	-0.29	-67.51	0
rs12617835	cg14317533	-0.29	-67.51	0
rs4676225	cg22489876	-0.21	-83.88	0
rs11675443	cg18349077	0.19	77.82	0
rs11123128	cg18349077	0.19	70.13	0
rs35326322	cg18349077	0.19	76.94	0
rs4848272	cg18349077	0.19	75.76	0
rs11675443	cg26844603	0.24	83.74	0
rs11123128	cg26844603	0.23	75.34	0
rs35326322	cg26844603	0.24	82.86	0
rs4848272	cg26844603	0.24	81.55	0
rs2160700	cg03043243	-0.19	-70.73	0
rs6722670	cg03043243	-0.19	-88.05	0
rs13398989	cg03043243	-0.19	-76.46	0
rs13031794	cg03085275	0.25	75.64	0
rs11691073	cg03085275	0.25	75.64	0
rs13002817	cg03085275	0.25	73.85	0
rs145028775	cg03085275	0.24	67.97	0
rs13003130	cg03085275	0.25	68.84	0
rs11674632	cg03085275	0.24	64.08	0
rs11694321	cg03085275	0.25	69.52	0
rs11677795	cg03085275	0.25	69.52	0
rs36140780	cg03085275	0.25	69.52	0
rs67077741	cg03085275	0.24	67.15	0
rs264618	cg13920856	-0.47	-112.07	0
rs264619	cg13920856	-0.47	-112.07	0
rs264578	cg13920856	-0.47	-105.88	0
rs4853718	cg13263947	0.27	65.13	0
rs55987230	cg13263947	0.27	73.52	0
rs34274882	cg13263947	0.27	66.44	0
rs149021097	cg13263947	0.27	70.64	0
rs36055519	cg13263947	0.27	66.91	0
rs34417560	cg13263947	0.28	74.11	0
rs12615925	cg13263947	0.27	69.19	0
rs13029743	cg13263947	0.28	72.49	0
rs6434400	cg13263947	0.28	77.14	0
rs7608180	cg13263947	0.28	77.14	0
rs12987797	cg13263947	0.28	88.05	0
rs4853720	cg13263947	0.28	88.05	0
rs13028201	cg13263947	0.27	72.63	0
rs74723351	cg06012621	-0.36	-63.91	0
rs3732009	cg06012621	-0.36	-63.93	0
rs1478581	cg06012621	-0.36	-64.32	0
rs6734808	cg06012621	-0.36	-66.74	0
rs13388294	cg06012621	-0.37	-118.83	0
rs57481445	cg06012621	-0.37	-110.39	0
rs13002451	cg06012621	-0.36	-75.76	0
rs6801981	cg04584675	-0.21	-85.22	0
rs9828229	cg27104695	-0.14	-65.58	0
rs3774639	cg08033130	0.23	73.66	0
rs35465473	cg08033130	0.23	66.99	0
rs247412	cg10123377	0.46	97.57	0
rs2276856	cg12609415	0.14	70.77	0
rs751667	cg12609415	0.14	70.76	0
rs6441923	cg24104237	-0.2	-82.11	0
rs2624673	cg24104237	-0.2	-82.11	0
rs2578693	cg24104237	-0.2	-82.11	0
rs73109070	cg12333628	-0.46	-94.83	0
rs11128234	cg12333628	-0.46	-94.83	0
rs11128235	cg12333628	-0.46	-94.83	0
rs1113458	cg12333628	-0.46	-94.83	0
rs10446390	cg12333628	-0.46	-77.24	0
rs12490353	cg12333628	-0.46	-83.63	0
rs12487153	cg12333628	-0.46	-81.16	0
rs7624135	cg12333628	-0.46	-81.16	0
rs7645868	cg12333628	-0.46	-80.93	0
rs6809990	cg13011961	0.24	69.15	0
rs6810001	cg13011961	0.24	76.17	0
rs13320428	cg13011961	0.24	76.17	0
rs9860210	cg22300541	0.16	75.15	0
rs9856064	cg22300541	0.16	75.15	0
rs9874248	cg22300541	0.16	75.15	0
rs9836880	cg22300541	0.16	75.15	0
rs9841825	cg22300541	0.16	75.15	0
rs9842338	cg22300541	0.16	75.15	0
rs58422650	cg22300541	0.16	75.15	0
rs59481254	cg22300541	0.16	75.15	0
rs72889957	cg22300541	0.16	73.6	0
rs72889958	cg22300541	0.16	74.98	0
rs72889959	cg22300541	0.16	74.98	0
rs9867833	cg22300541	0.16	74.32	0
rs9851742	cg22300541	0.16	74.32	0
rs9852660	cg22300541	0.16	65.58	0
rs9872533	cg22300541	0.16	74.32	0
rs9857508	cg22300541	0.16	65.58	0
rs9883201	cg22300541	0.16	64.31	0
rs58605251	cg22300541	0.16	65.18	0
rs56919731	cg22300541	0.16	65.18	0
rs72889970	cg22300541	0.16	65.18	0
rs12330823	cg22300541	0.16	64.23	0
rs1398608	cg25738505	-0.28	-80.89	0
rs7618221	cg25738505	-0.28	-80.89	0
rs978699	cg25738505	-0.28	-80.89	0
rs978698	cg25738505	-0.28	-80.89	0
rs978697	cg25738505	-0.28	-80.89	0
rs1554034	cg25738505	-0.28	-80.89	0
rs2137542	cg25738505	-0.28	-80.89	0
rs2137541	cg25738505	-0.28	-80.89	0
rs1398607	cg25738505	-0.28	-80.89	0
rs1398606	cg25738505	-0.28	-80.89	0
rs10804863	cg25738505	-0.28	-80.89	0
rs10804864	cg25738505	-0.28	-80.89	0
rs12633738	cg25738505	-0.28	-80.89	0
rs12636293	cg25738505	-0.28	-79.69	0
rs12633801	cg25738505	-0.28	-80.89	0
rs12633824	cg25738505	-0.28	-80.89	0
rs12633825	cg25738505	-0.28	-80.89	0
rs35012227	cg25738505	-0.28	-80.89	0
rs60024366	cg25738505	-0.28	-80.89	0
rs6791429	cg25738505	-0.28	-80.89	0
rs6791614	cg25738505	-0.28	-80.88	0
rs7625531	cg25738505	-0.28	-80.76	0
rs6441635	cg25738505	-0.28	-80.76	0
rs6441636	cg25738505	-0.28	-80.76	0
rs6441637	cg25738505	-0.28	-80.76	0
rs6441638	cg25738505	-0.28	-80.76	0
rs6441639	cg25738505	-0.28	-79.51	0
rs6441640	cg25738505	-0.28	-79.51	0
rs4371490	cg25738505	-0.28	-80.76	0
rs4371491	cg25738505	-0.28	-80.76	0
rs4371492	cg25738505	-0.28	-80.76	0
rs6806905	cg25738505	-0.28	-79	0
rs6801361	cg25738505	-0.28	-73.36	0
rs6809527	cg25738505	-0.28	-76.42	0
rs6798842	cg25738505	-0.28	-73.36	0
rs143376496	cg25738505	-0.28	-80.75	0
rs150875552	cg25738505	-0.28	-80.75	0
rs145124617	cg25738505	-0.28	-80.75	0
rs149214193	cg25738505	-0.28	-80.75	0
rs145123245	cg25738505	-0.28	-80.75	0
rs142922445	cg25738505	-0.28	-80.28	0
rs138537857	cg25738505	-0.28	-78.28	0
rs6798344	cg25738505	-0.28	-80.35	0
rs6774619	cg25738505	-0.28	-80.35	0
rs6775017	cg25738505	-0.28	-80.03	0
rs149480856	cg25738505	-0.28	-80.35	0
rs76320119	cg25738505	-0.28	-80.35	0
rs4315667	cg25738505	-0.28	-76.39	0
rs4629307	cg25738505	-0.28	-76.39	0
rs4453814	cg25738505	-0.28	-74.56	0
rs4261855	cg25738505	-0.28	-74.56	0
rs4283552	cg25738505	-0.28	-78.87	0
rs6438808	cg12235788	0.26	82	0
rs936169	cg12235788	0.25	68.19	0
rs936168	cg12235788	0.25	67.04	0
rs936167	cg12235788	0.25	68.19	0
rs7621343	cg12235788	0.25	67.04	0
rs936166	cg12235788	0.25	68.19	0
rs4677901	cg12235788	0.25	68.19	0
rs2078526	cg12235788	0.25	68.19	0
rs719860	cg12235788	0.25	68.19	0
rs755889	cg12235788	0.26	69.48	0
rs755890	cg12235788	0.26	68.27	0
rs1456123	cg12235788	0.26	68.27	0
rs9860263	cg12235788	0.26	68.27	0
rs9842667	cg12235788	0.26	68.27	0
rs9860436	cg12235788	0.26	68.27	0
rs9823444	cg12235788	0.26	85.9	0
rs9843829	cg12235788	0.26	68.27	0
rs7620887	cg12235788	0.26	68.22	0
rs7633654	cg12235788	0.26	68.39	0
rs9825707	cg12235788	0.26	87.17	0
rs7623747	cg12235788	0.26	87.17	0
rs4678051	cg12235788	0.26	83.27	0
rs4678052	cg12235788	0.26	83.27	0
rs11927101	cg15145296	0.3	75.78	0
rs11925047	cg15145296	0.3	76.03	0
rs12636296	cg15145296	0.3	78.29	0
rs12636284	cg15145296	0.3	78.29	0
rs35120077	cg15145296	0.3	76.53	0
rs60179307	cg15145296	0.3	80.12	0
rs1875682	cg15145296	0.3	76.59	0
rs1566714	cg15145296	0.3	85.01	0
rs3804587	cg15145296	0.3	88.14	0
rs7647098	cg15145296	0.29	77.63	0
rs36185	cg07068406	0.25	77.98	0
rs36184	cg07068406	0.25	78.62	0
rs36182	cg07068406	0.25	77.33	0
rs36181	cg07068406	0.25	77.33	0
rs1548013	cg03673894	0.28	74.2	0
rs9825140	cg03673894	0.29	75.85	0
rs56216140	cg07718431	-0.25	-71.93	0
rs11710227	cg07718431	-0.25	-75.95	0
rs11718183	cg07718431	-0.25	-80.71	0
rs11921892	cg07718431	-0.24	-68.73	0
rs9826842	cg21153275	0.2	73.39	0
rs62411564	cg02722613	0.34	92.52	0
rs73094683	cg02722613	0.35	129.78	0
rs62411567	cg02722613	0.35	129.78	0
rs62411568	cg02722613	0.35	129.78	0
rs62411570	cg02722613	0.35	129.78	0
rs73238389	cg11037025	0.25	66.04	0
rs4260599	cg19978674	0.26	90.86	0
rs4558922	cg19978674	0.26	98.06	0
rs7693834	cg19978674	0.26	102.25	0
rs4859608	cg02576920	-0.2	-63.68	0
rs4304003	cg02576920	-0.2	-63.68	0
rs2015255	cg10806175	0.29	64.63	0
rs6535425	cg10806175	0.29	64.63	0
rs28675979	cg10806175	0.29	91.95	0
rs1563645	cg10806175	0.29	66.34	0
rs1398944	cg22920707	-0.26	-69.88	0
rs7658455	cg22920707	-0.25	-68.45	0
rs1452689	cg04764455	-0.19	-64.93	0
rs28704690	cg04764455	-0.2	-75.22	0
rs1846824	cg13799104	-0.37	-121.16	0
rs978539	cg13799104	-0.37	-121.16	0
rs1828512	cg13799104	-0.37	-121.16	0
rs34365512	cg13799104	-0.37	-121.16	0
rs10518600	cg13799104	-0.37	-121.16	0
rs13147076	cg13799104	-0.37	-121.16	0
rs6846639	cg13799104	-0.37	-121.16	0
rs1397864	cg13799104	-0.37	-121.16	0
rs6817917	cg13799104	-0.37	-121.16	0
rs10027907	cg13799104	-0.37	-121.16	0
rs55677301	cg13799104	-0.37	-121.16	0
rs10023844	cg13799104	-0.37	-121.16	0
rs13151772	cg13799104	-0.37	-121.16	0
rs13134092	cg13799104	-0.37	-121.16	0
rs28704773	cg13799104	-0.37	-119.86	0
rs6855387	cg13799104	-0.37	-119.86	0
rs6832790	cg13799104	-0.37	-119.86	0
rs4262003	cg13799104	-0.37	-119.86	0
rs1511500	cg13799104	-0.37	-119.86	0
rs2877317	cg19712474	-0.28	-74.11	0
rs2331243	cg19712474	-0.28	-74.11	0
rs76685589	cg19712474	-0.28	-74.24	0
rs140231049	cg19712474	-0.28	-74.01	0
rs11960741	cg23129178	-0.46	-71.1	0
rs11960747	cg23129178	-0.46	-71.1	0
rs11960771	cg23129178	-0.46	-71.1	0
rs57531042	cg23129178	-0.47	-127	0
rs6894068	cg23129178	-0.47	-128.54	0
rs11956111	cg23129178	-0.47	-128.54	0
rs11956112	cg23129178	-0.47	-128.54	0
rs61027174	cg23129178	-0.47	-119.39	0
rs57512350	cg23129178	-0.47	-145.34	0
rs2112350	cg23129178	-0.47	-147.87	0
rs56832737	cg23129178	-0.47	-147.87	0
rs60385047	cg23129178	-0.47	-121.05	0
rs6870090	cg23129178	-0.47	-121.05	0
rs73124747	cg23129178	-0.47	-147.87	0
rs16872693	cg23129178	-0.47	-147.87	0
rs73124750	cg23129178	-0.47	-147.87	0
rs60609097	cg23129178	-0.47	-105.22	0
rs11948350	cg23129178	-0.47	-93.62	0
rs6873291	cg05139080	-0.23	-68.46	0
rs6898414	cg05139080	-0.23	-68.46	0
rs6872053	cg05139080	-0.23	-68.46	0
rs6873633	cg05139080	-0.23	-68.46	0
rs61424752	cg05139080	-0.23	-68.46	0
rs56387826	cg05139080	-0.23	-68.46	0
rs55873989	cg05139080	-0.23	-68.46	0
rs6863904	cg05139080	-0.23	-68.78	0
rs6863905	cg05139080	-0.23	-68.78	0
rs6859912	cg05139080	-0.23	-68.78	0
rs6864411	cg05139080	-0.23	-68.78	0
rs7722745	cg05139080	-0.23	-68.87	0
rs7705992	cg05139080	-0.23	-69.16	0
rs59409867	cg05139080	-0.23	-69.16	0
rs6895903	cg05139080	-0.23	-69.16	0
rs6894705	cg05139080	-0.23	-69.16	0
rs27043	cg08986950	0.42	75.13	0
rs27044	cg08986950	0.42	145.69	0
rs27432	cg08986950	0.42	163.81	0
rs39840	cg08986950	0.42	75.63	0
rs39841	cg08986950	0.42	160.91	0
rs30376	cg08986950	0.42	160.91	0
rs42398	cg08986950	0.41	78.09	0
rs2918265	cg25420767	0.23	65.68	0
rs2546372	cg05804568	0.31	72.4	0
rs6896190	cg10547329	-0.38	-83.59	0
rs6881831	cg10547329	-0.38	-83.7	0
rs7707331	cg10547329	-0.37	-70.79	0
rs7727159	cg10547329	-0.38	-81.94	0
rs7727527	cg10547329	-0.39	-120.34	0
rs12033	cg10547329	-0.38	-78.37	0
rs17054759	cg20071413	0.24	69.65	0
rs56097795	cg20071413	0.24	69.65	0
rs6867454	cg20071413	0.24	69.65	0
rs9379166	cg12777182	0.21	71.4	0
rs9379675	cg00944873	0.23	78.51	0
rs9393570	cg00944873	0.23	79.25	0
rs9393571	cg00944873	0.23	79.25	0
rs9358777	cg00944873	0.23	79.25	0
rs9358778	cg00944873	0.23	79.25	0
rs9379676	cg00944873	0.23	76.21	0
rs9366574	cg00944873	0.23	79.25	0
rs6456622	cg00944873	0.23	80	0
rs6903205	cg00944873	0.23	80	0
rs6923143	cg00944873	0.23	80	0
rs6923652	cg00944873	0.23	80	0
rs6923845	cg00944873	0.23	80	0
rs6903738	cg00944873	0.23	80	0
rs6923867	cg00944873	0.23	80	0
rs4712835	cg00944873	0.23	80	0
rs9358783	cg00944873	0.23	76.46	0
rs9358784	cg00944873	0.23	76.46	0
rs2206525	cg00944873	0.23	76.9	0
rs2223590	cg00944873	0.23	75.5	0
rs6917244	cg00944873	0.23	80.5	0
rs7755563	cg00944873	0.23	76.9	0
rs7759747	cg00944873	0.23	78	0
rs7760198	cg00944873	0.23	81.98	0
rs9356940	cg00944873	0.23	76.79	0
rs9356941	cg00944873	0.23	78.2	0
rs9366575	cg00944873	0.23	79.09	0
rs9366576	cg00944873	0.23	74.7	0
rs9358785	cg00944873	0.22	64.38	0
rs9467245	cg00944873	0.23	79.09	0
rs10806989	cg00944873	0.23	79.09	0
rs6935753	cg00944873	0.24	89.5	0
rs9461044	cg00944873	0.24	89.5	0
rs2328846	cg00944873	0.24	90.18	0
rs2038139	cg00944873	0.24	89.5	0
rs2038138	cg00944873	0.24	89.5	0
rs2235677	cg00944873	0.24	89.5	0
rs2038135	cg00944873	0.24	90.14	0
rs6456625	cg00944873	0.24	90.14	0
rs1883594	cg00944873	0.24	90.14	0
rs1883592	cg00944873	0.24	90.14	0
rs1555090	cg00944873	0.24	90.14	0
rs1555089	cg00944873	0.24	90.14	0
rs9467249	cg00944873	0.24	76.53	0
rs374317	cg03449857	-0.35	-66.59	0
rs375248	cg03449857	-0.37	-74.34	0
rs375984	cg03449857	-0.37	-74.34	0
rs376319	cg03449857	-0.37	-74.34	0
rs2535238	cg03449857	-0.37	-74.34	0
rs2747421	cg03449857	-0.37	-74.34	0
rs387642	cg03449857	-0.37	-71.9	0
rs387640	cg03449857	-0.37	-74.34	0
rs3129062	cg03449857	-0.37	-74.34	0
rs448380	cg03449857	-0.37	-74.34	0
rs416568	cg03449857	-0.36	-67.87	0
rs448489	cg03449857	-0.37	-74.34	0
rs2747427	cg03449857	-0.37	-74.34	0
rs2747428	cg03449857	-0.37	-74.34	0
rs417764	cg03449857	-0.37	-71.9	0
rs2747429	cg03449857	-0.37	-74.34	0
rs365052	cg03449857	-0.36	-68.16	0
rs2747431	cg03449857	-0.36	-68.16	0
rs3117301	cg03449857	-0.37	-72.92	0
rs2747460	cg03449857	-0.37	-72.92	0
rs2535275	cg03449857	-0.37	-72.92	0
rs2535274	cg03449857	-0.36	-71.26	0
rs2907897	cg03449857	-0.36	-71.26	0
rs3129035	cg03449857	-0.36	-71.26	0
rs3116814	cg03449857	-0.36	-71.26	0
rs3129033	cg03449857	-0.37	-72.83	0
rs3116811	cg03449857	-0.37	-72.83	0
rs3131890	cg03449857	-0.37	-72.83	0
rs56052612	cg00947782	0.33	73.11	0
rs56052612	cg03343571	0.33	67	0
rs17180542	cg00947782	0.33	72.02	0
rs17180542	cg03343571	0.33	65.62	0
rs3734830	cg00947782	0.33	71.85	0
rs3734830	cg03343571	0.33	66.05	0
rs3734831	cg00947782	0.33	71.85	0
rs3734831	cg03343571	0.33	66.05	0
rs3734833	cg00947782	0.33	72.64	0
rs3734833	cg03343571	0.33	66.65	0
rs73725904	cg00947782	0.33	72.64	0
rs73725904	cg03343571	0.33	66.65	0
rs73428121	cg00947782	0.33	72.64	0
rs73428121	cg03343571	0.33	66.65	0
rs57035982	cg00947782	0.33	72.64	0
rs57035982	cg03343571	0.33	66.65	0
rs56015532	cg00947782	0.33	72.1	0
rs56015532	cg03343571	0.33	66.24	0
rs57080532	cg00947782	0.33	72.1	0
rs57080532	cg03343571	0.33	66.24	0
rs57680173	cg00947782	0.33	72.1	0
rs57680173	cg03343571	0.33	66.24	0
rs55760574	cg00947782	0.33	72.1	0
rs55760574	cg03343571	0.33	66.24	0
rs60587228	cg00947782	0.33	72.1	0
rs60587228	cg03343571	0.33	66.24	0
rs56385845	cg00947782	0.33	72.1	0
rs56385845	cg03343571	0.33	66.24	0
rs58161185	cg00947782	0.33	72.1	0
rs58161185	cg03343571	0.33	66.24	0
rs115247103	cg00947782	0.33	72.1	0
rs115247103	cg03343571	0.33	66.24	0
rs35361490	cg00947782	0.33	69.9	0
rs35361490	cg03343571	0.33	64.61	0
rs34513540	cg00947782	0.33	70.4	0
rs34513540	cg03343571	0.33	65	0
rs114426132	cg00947782	0.33	70.4	0
rs114426132	cg03343571	0.33	65	0
rs115313680	cg00947782	0.33	70.4	0
rs115313680	cg03343571	0.33	65	0
rs11759891	cg00947782	0.33	72.64	0
rs11759891	cg03343571	0.33	66.65	0
rs11757750	cg00947782	0.33	73.11	0
rs11757750	cg03343571	0.33	67	0
rs11755337	cg00947782	0.33	70.7	0
rs11755337	cg03343571	0.33	65.18	0
rs11757792	cg00947782	0.33	70.7	0
rs11757792	cg03343571	0.33	65.18	0
rs11755374	cg00947782	0.33	70.7	0
rs11755374	cg03343571	0.33	65.18	0
rs61704409	cg00947782	0.33	74.24	0
rs61704409	cg03343571	0.33	67.78	0
rs200597728	cg00947782	0.33	65.77	0
rs201478901	cg00947782	0.33	65.77	0
rs35144883	cg00947782	0.33	74.24	0
rs35144883	cg03343571	0.33	67.78	0
rs58867136	cg00947782	0.33	74.24	0
rs58867136	cg03343571	0.33	67.78	0
rs17186930	cg00947782	0.33	74.24	0
rs17186930	cg03343571	0.33	67.78	0
rs17186937	cg00947782	0.33	74.74	0
rs17186937	cg03343571	0.33	68.14	0
rs17186944	cg00947782	0.33	74.74	0
rs17186944	cg03343571	0.33	68.14	0
rs11755966	cg00947782	0.33	74.74	0
rs11755966	cg03343571	0.33	68.14	0
rs11755984	cg00947782	0.33	74.74	0
rs11755984	cg03343571	0.33	68.14	0
rs11755961	cg00947782	0.33	74.74	0
rs11755961	cg03343571	0.33	68.14	0
rs11755992	cg00947782	0.33	74.74	0
rs11755992	cg03343571	0.33	68.14	0
rs11751331	cg00947782	0.33	74.74	0
rs11751331	cg03343571	0.33	68.14	0
rs11758493	cg00947782	0.33	74.74	0
rs11758493	cg03343571	0.33	68.14	0
rs11756025	cg00947782	0.33	74.74	0
rs11756025	cg03343571	0.33	68.14	0
rs73725908	cg00947782	0.33	74.74	0
rs73725908	cg03343571	0.33	68.14	0
rs73725909	cg00947782	0.33	74.74	0
rs73725909	cg03343571	0.33	68.14	0
rs73725910	cg00947782	0.33	74.74	0
rs73725910	cg03343571	0.33	68.14	0
rs73725912	cg00947782	0.33	74.74	0
rs73725912	cg03343571	0.33	68.14	0
rs73428151	cg00947782	0.33	74.74	0
rs73428151	cg03343571	0.33	68.14	0
rs73428152	cg00947782	0.33	74.74	0
rs73428152	cg03343571	0.33	68.14	0
rs35685401	cg00947782	0.33	74.74	0
rs35685401	cg03343571	0.33	68.14	0
rs12662947	cg00947782	0.33	74.74	0
rs12662947	cg03343571	0.33	68.14	0
rs12661394	cg00947782	0.33	74.53	0
rs12661394	cg03343571	0.33	67.72	0
rs12661411	cg00947782	0.33	74.74	0
rs12661411	cg03343571	0.33	68.14	0
rs12662967	cg00947782	0.33	74.74	0
rs12662967	cg03343571	0.33	68.14	0
rs73410503	cg00947782	0.33	74.53	0
rs73410503	cg03343571	0.33	67.72	0
rs34894339	cg00947782	0.33	74.74	0
rs34894339	cg03343571	0.33	68.14	0
rs73725917	cg00947782	0.33	74.74	0
rs73725917	cg03343571	0.33	68.14	0
rs35356382	cg00947782	0.33	74.74	0
rs35356382	cg03343571	0.33	68.14	0
rs35480831	cg00947782	0.33	74.53	0
rs35480831	cg03343571	0.33	67.72	0
rs35574636	cg00947782	0.33	74.53	0
rs35574636	cg03343571	0.33	67.72	0
rs35796574	cg00947782	0.33	74.53	0
rs35796574	cg03343571	0.33	67.72	0
rs17186979	cg00947782	0.33	74.74	0
rs17186979	cg03343571	0.33	68.14	0
rs17187021	cg00947782	0.33	74.74	0
rs17187021	cg03343571	0.33	68.14	0
rs17187035	cg00947782	0.33	74.74	0
rs17187035	cg03343571	0.33	68.14	0
rs17187077	cg00947782	0.33	74.74	0
rs17187077	cg03343571	0.33	68.14	0
rs17187141	cg00947782	0.33	74.74	0
rs17187141	cg03343571	0.33	68.14	0
rs17180759	cg00947782	0.33	74.74	0
rs17180759	cg03343571	0.33	68.14	0
rs73725921	cg00947782	0.33	74.74	0
rs73725921	cg03343571	0.33	68.14	0
rs75194734	cg00947782	0.33	74.74	0
rs75194734	cg03343571	0.33	68.14	0
rs17180794	cg00947782	0.33	74.74	0
rs17180794	cg03343571	0.33	68.14	0
rs73410515	cg00947782	0.33	74.74	0
rs73410515	cg03343571	0.33	68.14	0
rs73410518	cg00947782	0.33	74.74	0
rs73410518	cg03343571	0.33	68.14	0
rs202048005	cg00947782	0.33	73.22	0
rs202048005	cg03343571	0.33	67.55	0
rs76517404	cg00947782	0.33	74.74	0
rs76517404	cg03343571	0.33	68.14	0
rs112449932	cg00947782	0.33	74.74	0
rs112449932	cg03343571	0.33	68.14	0
rs73410524	cg00947782	0.33	74.74	0
rs73410524	cg03343571	0.33	68.14	0
rs73410525	cg00947782	0.33	74.74	0
rs73410525	cg03343571	0.33	68.14	0
rs112793716	cg00947782	0.33	74.74	0
rs112793716	cg03343571	0.33	68.14	0
rs73410528	cg00947782	0.33	74.74	0
rs73410528	cg03343571	0.33	68.14	0
rs79784673	cg00947782	0.33	73.86	0
rs79784673	cg03343571	0.33	67.16	0
rs75346666	cg00947782	0.33	74.74	0
rs75346666	cg03343571	0.33	68.14	0
rs74924489	cg00947782	0.33	73.86	0
rs74924489	cg03343571	0.33	67.16	0
rs73410530	cg00947782	0.33	73.86	0
rs73410530	cg03343571	0.33	67.16	0
rs74917974	cg00947782	0.33	74.74	0
rs74917974	cg03343571	0.33	68.14	0
rs77245934	cg00947782	0.33	74.74	0
rs77245934	cg03343571	0.33	68.14	0
rs12662336	cg00947782	0.33	74.74	0
rs12662336	cg03343571	0.33	68.14	0
rs12665186	cg00947782	0.33	74.74	0
rs12665186	cg03343571	0.33	68.14	0
rs12662611	cg00947782	0.33	74.74	0
rs12662611	cg03343571	0.33	68.14	0
rs12664166	cg00947782	0.33	74.74	0
rs12664166	cg03343571	0.33	68.14	0
rs7750582	cg00947782	0.33	63.79	0
rs17187224	cg00947782	0.33	75.43	0
rs17187224	cg03343571	0.33	68.62	0
rs17180864	cg00947782	0.33	76.03	0
rs17180864	cg03343571	0.33	69.24	0
rs17187252	cg00947782	0.33	76.03	0
rs17187252	cg03343571	0.33	69.24	0
rs6911583	cg00947782	0.33	76.03	0
rs6911583	cg03343571	0.33	69.24	0
rs58858573	cg00947782	0.33	76.03	0
rs58858573	cg03343571	0.33	69.24	0
rs10947040	cg00947782	0.33	76.03	0
rs10947040	cg03343571	0.33	69.24	0
rs12110437	cg00947782	0.33	76.03	0
rs12110437	cg03343571	0.33	69.24	0
rs72502507	cg00947782	0.33	76.03	0
rs72502507	cg03343571	0.33	69.24	0
rs12111210	cg00947782	0.33	76.03	0
rs12111210	cg03343571	0.33	69.24	0
rs17187349	cg00947782	0.33	72.63	0
rs17187349	cg03343571	0.33	66.42	0
rs12664967	cg00947782	0.33	74.54	0
rs12664967	cg03343571	0.33	68.22	0
rs10947042	cg00947782	0.33	74.54	0
rs10947042	cg03343571	0.33	68.22	0
rs28698859	cg00947782	0.33	74.54	0
rs28698859	cg03343571	0.33	68.22	0
rs72502509	cg00947782	0.33	74.54	0
rs72502509	cg03343571	0.33	68.22	0
rs12665444	cg00947782	0.33	74.54	0
rs12665444	cg03343571	0.33	68.22	0
rs10947043	cg00947782	0.33	74.54	0
rs10947043	cg03343571	0.33	68.22	0
rs11755549	cg00947782	0.33	74.54	0
rs11755549	cg03343571	0.33	68.22	0
rs7742799	cg00947782	0.33	77.96	0
rs7742799	cg03343571	0.34	70.57	0
rs7762851	cg00947782	0.33	77.96	0
rs7762851	cg03343571	0.34	70.57	0
rs7742712	cg00947782	0.33	77.66	0
rs7742712	cg03343571	0.34	70.33	0
rs11964113	cg00947782	0.33	76.14	0
rs11964113	cg03343571	0.33	69.11	0
rs11754605	cg00947782	0.33	77.96	0
rs11754605	cg03343571	0.34	70.57	0
rs6933897	cg00947782	0.33	79	0
rs6933897	cg03343571	0.34	71.3	0
rs6912001	cg00947782	0.33	73.71	0
rs6912001	cg03343571	0.33	67.95	0
rs11965458	cg00947782	0.33	79.65	0
rs11965458	cg03343571	0.34	71.7	0
rs73725950	cg00947782	0.33	79.65	0
rs73725950	cg03343571	0.34	71.7	0
rs73414461	cg00947782	0.33	76.93	0
rs73414461	cg03343571	0.33	69.22	0
rs73414465	cg00947782	0.33	79.65	0
rs73414465	cg03343571	0.34	71.7	0
rs3765608	cg00947782	0.33	79.65	0
rs3765608	cg03343571	0.34	71.7	0
rs73725953	cg00947782	0.33	79.65	0
rs73725953	cg03343571	0.34	71.7	0
rs12663252	cg00947782	0.33	79.65	0
rs12663252	cg03343571	0.34	71.7	0
rs2275852	cg00947782	0.33	70.06	0
rs2275852	cg03343571	0.33	64	0
rs2275851	cg00947782	0.33	74.65	0
rs2275851	cg03343571	0.33	67.53	0
rs12661053	cg00947782	0.33	79.13	0
rs12661053	cg03343571	0.34	71.23	0
rs11753431	cg00947782	0.33	79.65	0
rs11753431	cg03343571	0.34	71.7	0
rs11753957	cg00947782	0.33	79.65	0
rs11753957	cg03343571	0.34	71.7	0
rs11753960	cg00947782	0.33	79.65	0
rs11753960	cg03343571	0.34	71.7	0
rs11759388	cg00947782	0.33	79.65	0
rs11759388	cg03343571	0.34	71.7	0
rs11965585	cg00947782	0.33	79.65	0
rs11965585	cg03343571	0.34	71.7	0
rs11965659	cg00947782	0.33	79.65	0
rs11965659	cg03343571	0.34	71.7	0
rs6902901	cg00947782	0.33	79.65	0
rs6902901	cg03343571	0.34	71.7	0
rs6931672	cg00947782	0.33	79.65	0
rs6931672	cg03343571	0.34	71.7	0
rs6932091	cg00947782	0.33	79.65	0
rs6932091	cg03343571	0.34	71.7	0
rs17187488	cg00947782	0.33	79.65	0
rs17187488	cg03343571	0.34	71.7	0
rs6928966	cg00947782	0.33	79.65	0
rs6928966	cg03343571	0.34	71.7	0
rs17193851	cg00947782	0.33	79.65	0
rs17193851	cg03343571	0.34	71.7	0
rs10947045	cg00947782	0.33	77.72	0
rs10947045	cg03343571	0.34	70.72	0
rs73725970	cg00947782	0.33	79.65	0
rs73725970	cg03343571	0.34	71.7	0
rs73416498	cg00947782	0.33	79.65	0
rs73416498	cg03343571	0.34	71.7	0
rs73416501	cg00947782	0.33	79.65	0
rs73416501	cg03343571	0.34	71.7	0
rs35763150	cg00947782	0.33	79.65	0
rs35763150	cg03343571	0.34	71.7	0
rs76290849	cg00947782	0.33	79.65	0
rs76290849	cg03343571	0.34	71.7	0
rs375248	cg11747594	-0.33	-69.35	0
rs375984	cg11747594	-0.33	-69.35	0
rs376319	cg11747594	-0.33	-69.35	0
rs2535238	cg11747594	-0.33	-69.35	0
rs2747421	cg11747594	-0.33	-69.35	0
rs387642	cg11747594	-0.33	-67.48	0
rs387640	cg11747594	-0.33	-69.35	0
rs3129062	cg11747594	-0.33	-69.35	0
rs448380	cg11747594	-0.33	-69.35	0
rs416568	cg11747594	-0.32	-63.89	0
rs448489	cg11747594	-0.33	-69.35	0
rs2747427	cg11747594	-0.33	-69.35	0
rs2747428	cg11747594	-0.33	-69.35	0
rs417764	cg11747594	-0.33	-67.48	0
rs2747429	cg11747594	-0.33	-69.35	0
rs365052	cg11747594	-0.32	-64.08	0
rs2747431	cg11747594	-0.32	-64.08	0
rs3117301	cg11747594	-0.33	-68.31	0
rs2747460	cg11747594	-0.33	-68.31	0
rs2535275	cg11747594	-0.33	-68.31	0
rs2535274	cg11747594	-0.32	-67.11	0
rs2907897	cg11747594	-0.32	-67.11	0
rs3129035	cg11747594	-0.32	-67.11	0
rs3116814	cg11747594	-0.32	-67.11	0
rs3129033	cg11747594	-0.33	-68.11	0
rs3116811	cg11747594	-0.33	-68.11	0
rs3131890	cg11747594	-0.33	-68.11	0
rs56052612	cg10930308	0.38	76.93	0
rs17180542	cg10930308	0.38	76.36	0
rs3734830	cg10930308	0.38	75.5	0
rs3734831	cg10930308	0.38	75.5	0
rs3734833	cg10930308	0.38	76.4	0
rs73725904	cg10930308	0.38	76.4	0
rs73428121	cg10930308	0.38	76.4	0
rs57035982	cg10930308	0.38	76.4	0
rs56015532	cg10930308	0.38	75.77	0
rs57080532	cg10930308	0.38	75.77	0
rs57680173	cg10930308	0.38	75.77	0
rs55760574	cg10930308	0.38	75.77	0
rs60587228	cg10930308	0.38	75.77	0
rs56385845	cg10930308	0.38	75.77	0
rs58161185	cg10930308	0.38	75.77	0
rs115247103	cg10930308	0.38	75.77	0
rs35361490	cg10930308	0.38	73.39	0
rs34513540	cg10930308	0.38	73.97	0
rs114426132	cg10930308	0.38	73.97	0
rs115313680	cg10930308	0.38	73.97	0
rs11759891	cg10930308	0.38	76.4	0
rs11757750	cg10930308	0.38	76.93	0
rs11755337	cg10930308	0.38	74.47	0
rs11757792	cg10930308	0.38	74.47	0
rs11755374	cg10930308	0.38	74.47	0
rs61704409	cg10930308	0.38	77.68	0
rs200597728	cg10930308	0.38	68.86	0
rs201478901	cg10930308	0.38	68.86	0
rs35144883	cg10930308	0.38	77.68	0
rs58867136	cg10930308	0.38	77.68	0
rs17186930	cg10930308	0.38	77.68	0
rs17186937	cg10930308	0.38	78.24	0
rs17186944	cg10930308	0.38	78.24	0
rs11755966	cg10930308	0.38	78.24	0
rs11755984	cg10930308	0.38	78.24	0
rs11755961	cg10930308	0.38	78.24	0
rs11755992	cg10930308	0.38	78.24	0
rs11751331	cg10930308	0.38	78.24	0
rs11758493	cg10930308	0.38	78.24	0
rs11756025	cg10930308	0.38	78.24	0
rs73725908	cg10930308	0.38	78.24	0
rs73725909	cg10930308	0.38	78.24	0
rs73725910	cg10930308	0.38	78.24	0
rs73725912	cg10930308	0.38	78.24	0
rs73428151	cg10930308	0.38	78.24	0
rs73428152	cg10930308	0.38	78.24	0
rs35685401	cg10930308	0.38	78.24	0
rs12662947	cg10930308	0.38	78.24	0
rs12661394	cg10930308	0.38	77.59	0
rs12661411	cg10930308	0.38	78.24	0
rs12662967	cg10930308	0.38	78.24	0
rs73410503	cg10930308	0.38	77.59	0
rs34894339	cg10930308	0.38	78.24	0
rs73725917	cg10930308	0.38	78.24	0
rs35356382	cg10930308	0.38	78.24	0
rs35480831	cg10930308	0.38	77.59	0
rs35574636	cg10930308	0.38	77.59	0
rs35796574	cg10930308	0.38	77.59	0
rs17186979	cg10930308	0.38	78.24	0
rs17187021	cg10930308	0.38	78.24	0
rs17187035	cg10930308	0.38	78.24	0
rs17187077	cg10930308	0.38	78.24	0
rs17187141	cg10930308	0.38	78.24	0
rs17180759	cg10930308	0.38	78.24	0
rs73725921	cg10930308	0.38	78.24	0
rs75194734	cg10930308	0.38	78.24	0
rs17180794	cg10930308	0.38	78.24	0
rs73410515	cg10930308	0.38	78.24	0
rs73410518	cg10930308	0.38	78.24	0
rs202048005	cg10930308	0.38	76.28	0
rs76517404	cg10930308	0.38	78.24	0
rs112449932	cg10930308	0.38	78.24	0
rs73410524	cg10930308	0.38	78.24	0
rs73410525	cg10930308	0.38	78.24	0
rs112793716	cg10930308	0.38	78.24	0
rs73410528	cg10930308	0.38	78.24	0
rs79784673	cg10930308	0.38	77.02	0
rs75346666	cg10930308	0.38	78.24	0
rs74924489	cg10930308	0.38	77.02	0
rs73410530	cg10930308	0.38	77.02	0
rs74917974	cg10930308	0.38	78.24	0
rs77245934	cg10930308	0.38	78.24	0
rs12662336	cg10930308	0.38	78.24	0
rs12665186	cg10930308	0.38	78.24	0
rs12662611	cg10930308	0.38	78.24	0
rs12664166	cg10930308	0.38	78.24	0
rs17187224	cg10930308	0.38	78.32	0
rs17180864	cg10930308	0.38	79.41	0
rs17187252	cg10930308	0.38	79.41	0
rs6911583	cg10930308	0.38	79.41	0
rs58858573	cg10930308	0.38	79.41	0
rs10947040	cg10930308	0.38	79.41	0
rs12110437	cg10930308	0.38	79.41	0
rs72502507	cg10930308	0.38	79.41	0
rs12111210	cg10930308	0.38	79.41	0
rs17187349	cg10930308	0.38	75.3	0
rs12664967	cg10930308	0.38	78.4	0
rs10947042	cg10930308	0.38	78.4	0
rs28698859	cg10930308	0.38	78.4	0
rs72502509	cg10930308	0.38	78.4	0
rs12665444	cg10930308	0.38	78.4	0
rs10947043	cg10930308	0.38	78.4	0
rs11755549	cg10930308	0.38	78.4	0
rs7742799	cg10930308	0.38	82.09	0
rs7762851	cg10930308	0.38	82.09	0
rs7742712	cg10930308	0.38	81.7	0
rs11964113	cg10930308	0.38	80.34	0
rs11754605	cg10930308	0.38	82.09	0
rs6933897	cg10930308	0.38	82.96	0
rs6912001	cg10930308	0.38	75.33	0
rs11965458	cg10930308	0.38	83.25	0
rs73725950	cg10930308	0.38	83.25	0
rs73414461	cg10930308	0.38	80.06	0
rs73414465	cg10930308	0.38	83.25	0
rs3765608	cg10930308	0.38	83.25	0
rs73725953	cg10930308	0.38	83.25	0
rs12663252	cg10930308	0.38	83.25	0
rs2275852	cg10930308	0.38	72.54	0
rs2275851	cg10930308	0.38	76.8	0
rs12661053	cg10930308	0.38	82.65	0
rs11753431	cg10930308	0.38	83.25	0
rs11753957	cg10930308	0.38	83.25	0
rs11753960	cg10930308	0.38	83.25	0
rs11759388	cg10930308	0.38	83.25	0
rs11965585	cg10930308	0.38	83.25	0
rs11965659	cg10930308	0.38	83.25	0
rs6902901	cg10930308	0.38	83.25	0
rs6931672	cg10930308	0.38	83.25	0
rs6932091	cg10930308	0.38	83.25	0
rs17187488	cg10930308	0.38	83.25	0
rs6928966	cg10930308	0.38	83.25	0
rs17193851	cg10930308	0.38	83.25	0
rs10947045	cg10930308	0.38	81.32	0
rs73725970	cg10930308	0.38	83.25	0
rs73416498	cg10930308	0.38	83.25	0
rs73416501	cg10930308	0.38	83.25	0
rs35763150	cg10930308	0.38	83.25	0
rs76290849	cg10930308	0.38	83.25	0
rs374317	cg16885113	-0.34	-69.46	0
rs375248	cg15570656	-0.4	-68.63	0
rs375248	cg15708526	-0.22	-66.37	0
rs375248	cg16885113	-0.36	-76.76	0
rs375984	cg15570656	-0.4	-68.63	0
rs375984	cg15708526	-0.22	-66.37	0
rs375984	cg16885113	-0.36	-76.76	0
rs376319	cg15570656	-0.4	-68.63	0
rs376319	cg15708526	-0.22	-66.37	0
rs376319	cg16885113	-0.36	-76.76	0
rs2535238	cg15570656	-0.4	-68.63	0
rs2535238	cg15708526	-0.22	-66.37	0
rs2535238	cg16885113	-0.36	-76.76	0
rs2747421	cg15570656	-0.4	-68.63	0
rs2747421	cg15708526	-0.22	-66.37	0
rs2747421	cg16885113	-0.36	-76.76	0
rs387642	cg15570656	-0.39	-66.43	0
rs387642	cg15708526	-0.22	-64.5	0
rs387642	cg16885113	-0.36	-74.56	0
rs387640	cg15570656	-0.4	-68.63	0
rs387640	cg15708526	-0.22	-66.37	0
rs387640	cg16885113	-0.36	-76.76	0
rs3129062	cg15570656	-0.4	-68.63	0
rs3129062	cg15708526	-0.22	-66.37	0
rs3129062	cg16885113	-0.36	-76.76	0
rs448380	cg15570656	-0.4	-68.63	0
rs448380	cg15708526	-0.22	-66.37	0
rs448380	cg16885113	-0.36	-76.76	0
rs416568	cg15570656	-0.39	-65.12	0
rs416568	cg16885113	-0.35	-69.1	0
rs448489	cg15570656	-0.4	-68.63	0
rs448489	cg15708526	-0.22	-66.37	0
rs448489	cg16885113	-0.36	-76.76	0
rs2747427	cg15570656	-0.4	-68.63	0
rs2747427	cg15708526	-0.22	-66.37	0
rs2747427	cg16885113	-0.36	-76.76	0
rs2747428	cg15570656	-0.4	-68.63	0
rs2747428	cg15708526	-0.22	-66.37	0
rs2747428	cg16885113	-0.36	-76.76	0
rs417764	cg15570656	-0.39	-66.43	0
rs417764	cg15708526	-0.22	-64.5	0
rs417764	cg16885113	-0.36	-74.56	0
rs2747429	cg15570656	-0.4	-68.63	0
rs2747429	cg15708526	-0.22	-66.37	0
rs2747429	cg16885113	-0.36	-76.76	0
rs365052	cg15570656	-0.39	-65.4	0
rs365052	cg16885113	-0.35	-69.34	0
rs2747431	cg15570656	-0.39	-65.4	0
rs2747431	cg16885113	-0.35	-69.34	0
rs3117301	cg15570656	-0.4	-67.38	0
rs3117301	cg15708526	-0.22	-65.29	0
rs3117301	cg16885113	-0.36	-75.32	0
rs2747460	cg15570656	-0.4	-67.38	0
rs2747460	cg15708526	-0.22	-65.29	0
rs2747460	cg16885113	-0.36	-75.32	0
rs2535275	cg15570656	-0.4	-67.38	0
rs2535275	cg15708526	-0.22	-65.29	0
rs2535275	cg16885113	-0.36	-75.32	0
rs2535274	cg15570656	-0.39	-66.04	0
rs2535274	cg15708526	-0.22	-64.29	0
rs2535274	cg16885113	-0.36	-73.89	0
rs2907897	cg15570656	-0.39	-66.04	0
rs2907897	cg15708526	-0.22	-64.29	0
rs2907897	cg16885113	-0.36	-73.89	0
rs3129035	cg15570656	-0.39	-66.04	0
rs3129035	cg15708526	-0.22	-64.29	0
rs3129035	cg16885113	-0.36	-73.89	0
rs3116814	cg15570656	-0.39	-66.04	0
rs3116814	cg15708526	-0.22	-64.29	0
rs3116814	cg16885113	-0.36	-73.89	0
rs3129033	cg15570656	-0.4	-67.31	0
rs3129033	cg15708526	-0.22	-65.08	0
rs3129033	cg16885113	-0.36	-74.98	0
rs3116811	cg15570656	-0.4	-67.31	0
rs3116811	cg15708526	-0.22	-65.08	0
rs3116811	cg16885113	-0.36	-74.98	0
rs3131890	cg15570656	-0.4	-67.31	0
rs3131890	cg15708526	-0.22	-65.08	0
rs3131890	cg16885113	-0.36	-74.98	0
rs2248693	cg18280909	-0.28	-76.25	0
rs1736916	cg18280909	-0.28	-76.69	0
rs1736914	cg18280909	-0.28	-76.69	0
rs1736910	cg18280909	-0.28	-75.45	0
rs932338	cg18280909	-0.28	-76.69	0
rs1610603	cg18280909	-0.28	-76.69	0
rs1610604	cg18280909	-0.28	-76.69	0
rs1610605	cg18280909	-0.28	-76.69	0
rs1610606	cg18280909	-0.28	-76.69	0
rs1610607	cg18280909	-0.28	-76.69	0
rs932341	cg18280909	-0.28	-76.69	0
rs909735	cg18280909	-0.28	-76.69	0
rs909732	cg18280909	-0.28	-76.69	0
rs1610613	cg18280909	-0.28	-76.69	0
rs1737087	cg18280909	-0.28	-77.61	0
rs1625607	cg18280909	-0.28	-77.61	0
rs1737084	cg18280909	-0.28	-78.08	0
rs733841	cg18280909	-0.28	-78.08	0
rs733840	cg18280909	-0.28	-78.08	0
rs909727	cg18280909	-0.28	-78.08	0
rs909726	cg18280909	-0.28	-78.08	0
rs1610737	cg18280909	-0.28	-78.08	0
rs1610738	cg18280909	-0.28	-78.08	0
rs909725	cg18280909	-0.28	-78.08	0
rs909724	cg18280909	-0.28	-78.08	0
rs909723	cg18280909	-0.28	-78.08	0
rs1610623	cg18280909	-0.28	-78.08	0
rs1610626	cg18280909	-0.28	-78.08	0
rs1611294	cg18280909	-0.28	-77.03	0
rs1611297	cg18280909	-0.28	-78.08	0
rs9258254	cg18280909	-0.28	-78.08	0
rs6933762	cg18280909	-0.28	-78.08	0
rs2735050	cg18280909	-0.28	-78.08	0
rs1633076	cg18280909	-0.28	-78.08	0
rs1737081	cg18280909	-0.28	-78.08	0
rs1633074	cg18280909	-0.28	-77.76	0
rs1474610	cg18280909	-0.28	-77.76	0
rs1633071	cg18280909	-0.28	-78.08	0
rs1633070	cg18280909	-0.28	-69.68	0
rs1633069	cg18280909	-0.28	-78.08	0
rs1633068	cg18280909	-0.28	-76.51	0
rs1737079	cg18280909	-0.28	-78.08	0
rs1626636	cg18280909	-0.28	-78.08	0
rs3131858	cg18280909	-0.28	-77.28	0
rs1633064	cg18280909	-0.28	-78.08	0
rs1633062	cg18280909	-0.28	-78.08	0
rs1633061	cg18280909	-0.28	-78.08	0
rs1633060	cg18280909	-0.28	-76.47	0
rs1737075	cg18280909	-0.28	-78.08	0
rs1633058	cg18280909	-0.28	-78.08	0
rs1633057	cg18280909	-0.28	-78.08	0
rs1633056	cg18280909	-0.28	-78.08	0
rs1737074	cg18280909	-0.28	-78.08	0
rs1610627	cg18280909	-0.28	-78.08	0
rs113795410	cg18280909	-0.28	-78.08	0
rs1737073	cg18280909	-0.28	-73.61	0
rs1610727	cg18280909	-0.28	-73.59	0
rs1633055	cg18280909	-0.28	-78.08	0
rs1611278	cg18280909	-0.28	-78.08	0
rs1611279	cg18280909	-0.28	-78.08	0
rs1610728	cg18280909	-0.28	-78.08	0
rs1610630	cg18280909	-0.28	-73.92	0
rs1610632	cg18280909	-0.28	-66.24	0
rs1633052	cg18280909	-0.28	-69.91	0
rs1633051	cg18280909	-0.28	-69.91	0
rs1633050	cg18280909	-0.28	-69.91	0
rs1633049	cg18280909	-0.28	-69.91	0
rs1737070	cg18280909	-0.28	-69.91	0
rs1633048	cg18280909	-0.28	-69.91	0
rs1737068	cg18280909	-0.28	-69.91	0
rs1737066	cg18280909	-0.28	-69.91	0
rs1737065	cg18280909	-0.28	-69.91	0
rs1633046	cg18280909	-0.28	-69.91	0
rs1633045	cg18280909	-0.28	-69.51	0
rs11967317	cg00947782	0.33	79.65	0
rs11967317	cg03343571	0.34	71.7	0
rs11967331	cg00947782	0.33	79.65	0
rs11967331	cg03343571	0.34	71.7	0
rs7764237	cg00947782	0.33	79.65	0
rs7764237	cg03343571	0.34	71.7	0
rs7746555	cg00947782	0.33	79.65	0
rs7746555	cg03343571	0.34	71.7	0
rs58555592	cg00947782	0.33	79.65	0
rs58555592	cg03343571	0.34	71.7	0
rs2894006	cg00947782	0.33	79.65	0
rs2894006	cg03343571	0.34	71.7	0
rs112400819	cg00947782	0.32	67.29	0
rs113739823	cg00947782	0.33	79.65	0
rs113739823	cg03343571	0.34	71.7	0
rs17187523	cg00947782	0.33	78.81	0
rs17187523	cg03343571	0.34	71.01	0
rs10947046	cg00947782	0.33	79.65	0
rs10947046	cg03343571	0.34	71.7	0
rs73420421	cg00947782	0.33	79.65	0
rs73420421	cg03343571	0.34	71.7	0
rs58980848	cg00947782	0.33	78.71	0
rs58980848	cg03343571	0.34	70.86	0
rs60252474	cg00947782	0.33	66.77	0
rs60265332	cg00947782	0.33	66.77	0
rs58314476	cg00947782	0.33	78.71	0
rs58314476	cg03343571	0.34	70.86	0
rs73420434	cg00947782	0.33	76.91	0
rs73420434	cg03343571	0.33	69.43	0
rs73725984	cg00947782	0.33	76.91	0
rs73725984	cg03343571	0.33	69.43	0
rs73420439	cg00947782	0.33	76.91	0
rs73420439	cg03343571	0.33	69.43	0
rs10947047	cg00947782	0.33	79.65	0
rs10947047	cg03343571	0.34	71.7	0
rs11962771	cg00947782	0.33	78.71	0
rs11962771	cg03343571	0.34	70.86	0
rs12661609	cg00947782	0.33	78.71	0
rs12661609	cg03343571	0.34	70.86	0
rs12664794	cg00947782	0.33	79.65	0
rs12664794	cg03343571	0.34	71.7	0
rs60477028	cg00947782	0.33	79.65	0
rs60477028	cg03343571	0.34	71.7	0
rs11965452	cg00947782	0.33	64.12	0
rs6940552	cg00947782	0.33	79.65	0
rs6940552	cg03343571	0.34	71.7	0
rs11966447	cg00947782	0.33	64.12	0
rs11966449	cg00947782	0.33	64.12	0
rs11963840	cg00947782	0.33	64.12	0
rs6457137	cg00947782	0.33	64.12	0
rs6457138	cg00947782	0.33	79.65	0
rs6457138	cg03343571	0.34	71.7	0
rs112965058	cg00947782	0.33	64.12	0
rs73420484	cg00947782	0.33	64.12	0
rs56216735	cg00947782	0.33	64.12	0
rs28570682	cg00947782	0.33	64.12	0
rs57799064	cg00947782	0.33	64.12	0
rs3757328	cg00947782	0.33	64.12	0
rs3757333	cg00947782	0.33	64.12	0
rs28625343	cg00947782	0.33	79.65	0
rs28625343	cg03343571	0.34	71.7	0
rs73728107	cg00947782	0.33	79.65	0
rs73728107	cg03343571	0.34	71.7	0
rs11753382	cg00947782	0.33	79.65	0
rs11753382	cg03343571	0.34	71.7	0
rs11753939	cg00947782	0.33	79.65	0
rs11753939	cg03343571	0.34	71.7	0
rs11965379	cg00947782	0.33	79.65	0
rs11965379	cg03343571	0.34	71.7	0
rs11965540	cg00947782	0.33	79.65	0
rs11965540	cg03343571	0.34	71.7	0
rs2285805	cg00947782	0.33	79.65	0
rs2285805	cg03343571	0.34	71.7	0
rs11967317	cg10930308	0.38	83.25	0
rs11967331	cg10930308	0.38	83.25	0
rs7764237	cg10930308	0.38	83.25	0
rs7746555	cg10930308	0.38	83.25	0
rs58555592	cg10930308	0.38	83.25	0
rs2894006	cg10930308	0.38	83.25	0
rs112400819	cg10930308	0.37	69.69	0
rs113739823	cg10930308	0.38	83.25	0
rs17187523	cg10930308	0.38	81.96	0
rs10947046	cg10930308	0.38	83.25	0
rs73420421	cg10930308	0.38	83.25	0
rs58980848	cg10930308	0.38	82.42	0
rs60252474	cg10930308	0.38	68.47	0
rs60265332	cg10930308	0.38	68.47	0
rs58314476	cg10930308	0.38	82.42	0
rs73420434	cg10930308	0.38	80.54	0
rs73725984	cg10930308	0.38	80.54	0
rs73420439	cg10930308	0.38	80.54	0
rs10947047	cg10930308	0.38	83.25	0
rs11962771	cg10930308	0.38	82.42	0
rs12661609	cg10930308	0.38	82.42	0
rs12664794	cg10930308	0.38	83.25	0
rs60477028	cg10930308	0.38	83.25	0
rs11965452	cg10930308	0.38	64.56	0
rs6940552	cg10930308	0.38	83.25	0
rs11966447	cg10930308	0.38	64.56	0
rs11966449	cg10930308	0.38	64.56	0
rs11963840	cg10930308	0.38	64.56	0
rs6457137	cg10930308	0.38	64.56	0
rs6457138	cg10930308	0.38	83.25	0
rs112965058	cg10930308	0.38	64.56	0
rs73420484	cg10930308	0.38	64.56	0
rs56216735	cg10930308	0.38	64.56	0
rs28570682	cg10930308	0.38	64.56	0
rs57799064	cg10930308	0.38	64.56	0
rs3757328	cg10930308	0.38	64.56	0
rs3757333	cg10930308	0.38	64.56	0
rs28625343	cg10930308	0.38	83.25	0
rs73728107	cg10930308	0.38	83.25	0
rs11753382	cg10930308	0.38	83.25	0
rs11753939	cg10930308	0.38	83.25	0
rs11965379	cg10930308	0.38	83.25	0
rs11965540	cg10930308	0.38	83.25	0
rs2285805	cg10930308	0.38	83.25	0
rs3131032	cg17857094	-0.33	-65.74	0
rs3131034	cg17857094	-0.32	-64.12	0
rs3130779	cg17857094	-0.32	-65.06	0
rs2532932	cg17857094	-0.33	-72.45	0
rs2517459	cg17857094	-0.32	-64.27	0
rs2253705	cg17857094	-0.33	-72.76	0
rs56366011	cg17857094	-0.35	-140.28	0
rs6933400	cg17857094	-0.35	-150.98	0
rs6933909	cg17857094	-0.35	-150.98	0
rs3891155	cg17857094	-0.35	-144.88	0
rs75787378	cg17857094	-0.35	-144.88	0
rs58893284	cg17857094	-0.35	-125.4	0
rs11970154	cg17857094	-0.34	-94.05	0
rs3095340	cg23397584	0.18	64.48	0
rs28894083	cg24433124	-0.33	-86.85	0
rs28894084	cg24433124	-0.33	-86.85	0
rs28894085	cg24433124	-0.33	-86.85	0
rs28894086	cg24433124	-0.33	-85.71	0
rs9468832	cg24433124	-0.33	-86.85	0
rs9461629	cg24433124	-0.33	-86.85	0
rs9468833	cg24433124	-0.33	-86.85	0
rs9461630	cg24433124	-0.33	-86.85	0
rs9295912	cg24433124	-0.33	-86.85	0
rs9461631	cg24433124	-0.33	-86.85	0
rs13207758	cg24433124	-0.33	-86.85	0
rs28894089	cg24433124	-0.33	-81.05	0
rs13211218	cg24433124	-0.32	-64.58	0
rs4713360	cg24433124	-0.33	-83.84	0
rs12527415	cg24433124	-0.34	-123.84	0
rs12527745	cg24433124	-0.34	-123.84	0
rs13196596	cg24433124	-0.34	-123.84	0
rs13197105	cg24433124	-0.34	-123.84	0
rs13197117	cg24433124	-0.34	-85.85	0
rs13213720	cg24433124	-0.34	-123.84	0
rs4713362	cg24433124	-0.34	-123.84	0
rs28780115	cg24433124	-0.34	-123.84	0
rs28780116	cg24433124	-0.34	-123.84	0
rs16897899	cg24433124	-0.34	-117.07	0
rs28780117	cg24433124	-0.34	-123.84	0
rs28780119	cg24433124	-0.34	-123.84	0
rs16897900	cg24433124	-0.34	-123.84	0
rs13201769	cg24433124	-0.34	-123.84	0
rs13201901	cg24433124	-0.34	-123.84	0
rs4713365	cg24433124	-0.34	-123.84	0
rs4711228	cg24433124	-0.34	-123.84	0
rs4713366	cg24433124	-0.34	-123.84	0
rs6920124	cg24433124	-0.34	-118.29	0
rs6900029	cg24433124	-0.34	-123.84	0
rs4711229	cg24433124	-0.34	-123.84	0
rs4713367	cg24433124	-0.34	-123.84	0
rs4711230	cg24433124	-0.34	-123.84	0
rs4713368	cg24433124	-0.34	-123.84	0
rs13206009	cg24433124	-0.34	-119.8	0
rs10947095	cg24433124	-0.34	-123.84	0
rs13210146	cg24433124	-0.34	-123.84	0
rs11758688	cg24433124	-0.34	-123.84	0
rs9295914	cg24433124	-0.34	-123.84	0
rs78434421	cg12296550	-0.2	-69.35	0
rs9273501	cg12296550	-0.2	-72.78	0
rs9273505	cg12296550	-0.2	-72.56	0
rs28724251	cg12296550	-0.2	-66.07	0
rs1130398	cg12296550	-0.2	-66.79	0
rs1063323	cg12296550	-0.2	-67.24	0
rs6931097	cg01602139	0.23	69.96	0
rs6457934	cg01602139	0.23	72.62	0
rs11758192	cg01602139	0.24	104.42	0
rs10947618	cg01602139	0.24	104.42	0
rs10947619	cg01602139	0.24	104.42	0
rs10947620	cg01602139	0.24	104.42	0
rs10947621	cg01602139	0.24	104.42	0
rs9349005	cg01602139	0.24	77.86	0
rs12174270	cg01602139	0.24	104.42	0
rs7747146	cg01602139	0.24	104.33	0
rs7764973	cg01602139	0.24	104.33	0
rs1010423	cg01602139	0.24	102.41	0
rs4711458	cg01602139	0.24	100.47	0
rs4711459	cg01602139	0.24	100.47	0
rs4711460	cg01602139	0.24	100.47	0
rs4711461	cg01602139	0.24	95.32	0
rs4714002	cg01602139	0.24	100.47	0
rs4711462	cg01602139	0.24	100.47	0
rs10947622	cg01602139	0.24	100.47	0
rs12214686	cg01602139	0.24	100.47	0
rs10947623	cg01602139	0.24	100.73	0
rs12192827	cg01602139	0.24	100.47	0
rs12192877	cg01602139	0.24	100.47	0
rs113266348	cg01602139	0.24	99.4	0
rs113041051	cg01602139	0.24	94.17	0
rs9357222	cg01602139	0.24	99.4	0
rs9394371	cg01602139	0.23	72.12	0
rs3829963	cg01602139	0.23	71.49	0
rs3829965	cg01602139	0.24	87.92	0
rs2796749	cg01879420	0.35	66.85	0
rs1279593	cg01879420	0.35	75.66	0
rs7770253	cg07185983	0.24	64.25	0
rs3813355	cg17829936	-0.16	-79.12	0
rs7770253	cg25399239	0.22	85.4	0
rs73055066	cg08408040	0.29	94.71	0
rs16876820	cg08408040	0.28	85.1	0
rs1621407	cg18806707	0.28	64.09	0
rs1668362	cg18806707	0.28	65.12	0
rs12701600	cg18806707	0.28	65.92	0
rs1717732	cg18806707	0.28	65.12	0
rs12669267	cg04068313	0.22	69.9	0
rs11762810	cg14507403	0.32	68.7	0
rs56006208	cg14507403	0.32	65.54	0
rs11768678	cg14507403	0.32	68.7	0
rs62479795	cg14507403	0.32	68.62	0
rs11761896	cg14507403	0.31	67.3	0
rs9942549	cg07876788	0.21	65.07	0
rs10273390	cg07876788	0.21	63.88	0
rs7803670	cg07876788	0.21	64.53	0
rs6976021	cg07876788	0.21	64.53	0
rs9918616	cg07876788	0.21	66.22	0
rs7801779	cg07876788	0.21	66.22	0
rs73153745	cg07876788	0.21	66.22	0
rs73153747	cg07876788	0.21	66.22	0
rs7776519	cg07876788	0.21	66.22	0
rs7787016	cg07876788	0.21	66.22	0
rs7805009	cg07876788	0.21	66.22	0
rs11971912	cg07876788	0.21	66.22	0
rs56096607	cg07876788	0.21	66.22	0
rs7809191	cg07876788	0.21	66.22	0
rs7794235	cg07876788	0.21	66.22	0
rs7794271	cg07876788	0.21	66.22	0
rs11770399	cg07876788	0.21	66.22	0
rs11763690	cg07876788	0.21	66.22	0
rs11767226	cg07876788	0.21	66.22	0
rs7781017	cg07876788	0.21	66.22	0
rs4481532	cg07876788	0.21	66.22	0
rs6970609	cg07876788	0.21	66.22	0
rs151128227	cg07876788	0.21	66.22	0
rs9656450	cg07876788	0.21	66.22	0
rs143401884	cg07876788	0.21	63.76	0
rs7777249	cg07876788	0.21	66.22	0
rs7777520	cg07876788	0.21	66.22	0
rs9656451	cg07876788	0.21	66.22	0
rs139690093	cg07876788	0.21	66.22	0
rs149993380	cg07876788	0.21	66.22	0
rs148443186	cg07876788	0.21	66.22	0
rs10954481	cg07876788	0.21	66.22	0
rs11976962	cg07876788	0.21	66.22	0
rs10250350	cg07876788	0.21	66.22	0
rs7798553	cg07876788	0.21	66.22	0
rs7785710	cg07876788	0.21	66.22	0
rs62479684	cg07876788	0.21	66.22	0
rs10488440	cg07876788	0.21	66.22	0
rs12531133	cg07876788	0.21	66.22	0
rs4732088	cg07876788	0.21	66.22	0
rs10215144	cg07876788	0.21	66.22	0
rs6964403	cg07876788	0.21	66.22	0
rs56072909	cg07876788	0.21	66.22	0
rs10239305	cg07876788	0.21	65.42	0
rs10258130	cg07876788	0.21	66.22	0
rs6956427	cg07876788	0.21	66.22	0
rs6949063	cg07876788	0.21	66.22	0
rs6978253	cg07876788	0.21	66.22	0
rs10272043	cg07876788	0.21	66.22	0
rs11982197	cg07876788	0.21	66.22	0
rs55776614	cg07876788	0.21	66.22	0
rs11768126	cg07876788	0.21	66.22	0
rs11771999	cg07876788	0.21	66.22	0
rs28368533	cg07876788	0.21	66.22	0
rs1962522	cg07876788	0.21	66.22	0
rs4449731	cg07876788	0.21	66.22	0
rs2348270	cg07876788	0.21	66.22	0
rs10227588	cg07876788	0.21	66.22	0
rs10227500	cg07876788	0.21	66.22	0
rs4732095	cg07876788	0.21	66.22	0
rs28733390	cg07876788	0.21	66.22	0
rs2348278	cg07876788	0.21	66.22	0
rs2348279	cg07876788	0.21	66.22	0
rs2348280	cg07876788	0.21	66.22	0
rs4728352	cg07876788	0.21	66.22	0
rs4732096	cg07876788	0.21	66.22	0
rs7385236	cg07876788	0.21	66.22	0
rs4732099	cg07876788	0.21	66.22	0
rs4732100	cg07876788	0.21	66.22	0
rs7805917	cg07876788	0.21	66.22	0
rs7809906	cg07876788	0.21	66.22	0
rs10263789	cg07876788	0.21	66.22	0
rs2881868	cg07876788	0.21	66.22	0
rs62479727	cg07876788	0.21	65.14	0
rs4732102	cg07876788	0.21	66.22	0
rs62479728	cg07876788	0.21	66.22	0
rs6972087	cg07876788	0.21	66.22	0
rs62479729	cg07876788	0.21	66.22	0
rs2348282	cg07876788	0.21	66.22	0
rs4604376	cg07876788	0.21	66.22	0
rs4498486	cg07876788	0.21	66.22	0
rs10266706	cg07876788	0.21	66.22	0
rs6964484	cg07876788	0.21	66.22	0
rs6467575	cg07876788	0.21	66.22	0
rs10275822	cg07876788	0.21	66.22	0
rs10235468	cg07876788	0.21	66.22	0
rs7797986	cg07876788	0.21	66.22	0
rs6952469	cg07876788	0.21	66.22	0
rs6953478	cg07876788	0.21	67.58	0
rs11765077	cg07876788	0.21	66.38	0
rs73725238	cg07876788	0.21	67.58	0
rs11761024	cg07876788	0.21	67.7	0
rs10243207	cg07876788	0.21	67.68	0
rs10231135	cg07876788	0.21	67.68	0
rs2348285	cg07876788	0.21	67.7	0
rs10238516	cg07876788	0.21	67.7	0
rs6945666	cg07876788	0.21	67.7	0
rs3735002	cg07876788	0.21	67.7	0
rs3735000	cg07876788	0.21	67.7	0
rs3800595	cg07876788	0.21	67.7	0
rs10280092	cg07876788	0.21	67.7	0
rs10271145	cg07876788	0.21	67.7	0
rs10954488	cg07876788	0.21	67.7	0
rs10274875	cg07876788	0.21	67.7	0
rs2348286	cg07876788	0.21	67.7	0
rs2348288	cg07876788	0.21	67.7	0
rs6978240	cg07876788	0.21	67.7	0
rs2881869	cg07876788	0.21	67.7	0
rs10224167	cg07876788	0.21	67.7	0
rs10268055	cg07876788	0.21	67.7	0
rs11971026	cg07876788	0.21	67.7	0
rs11971114	cg07876788	0.21	67.7	0
rs10272137	cg07876788	0.21	67.7	0
rs10242377	cg07876788	0.21	67.7	0
rs10272183	cg07876788	0.21	67.7	0
rs1364752	cg07876788	0.21	70.53	0
rs1080421	cg07876788	0.21	70.53	0
rs7790371	cg07876788	0.21	73.07	0
rs3778772	cg07876788	0.22	99.15	0
rs1035695	cg07876788	0.22	74.58	0
rs700415	cg07876788	0.22	76.75	0
rs3251	cg07876788	0.22	76.75	0
rs3250	cg07876788	0.22	76.75	0
rs11970825	cg07876788	0.22	99.15	0
rs3800592	cg07876788	0.22	99.15	0
rs2288237	cg07876788	0.22	99.15	0
rs2288238	cg07876788	0.22	99.15	0
rs73153794	cg07876788	0.22	96.15	0
rs9649052	cg07876788	0.22	99.15	0
rs2278126	cg07876788	0.22	99.15	0
rs6969894	cg07876788	0.22	99.15	0
rs2288239	cg07876788	0.22	86.2	0
rs12532630	cg07876788	0.22	89.99	0
rs12532662	cg07876788	0.22	75.56	0
rs10954489	cg07876788	0.22	74.92	0
rs12112778	cg07876788	0.21	73.1	0
rs12112025	cg14771419	0.2	64.31	0
rs10952522	cg14771419	0.2	64.61	0
rs10952523	cg14771419	0.2	64.61	0
rs965274	cg14771419	0.2	72.9	0
rs1007320	cg14771419	0.2	72.74	0
rs1014956	cg14771419	0.19	67.63	0
rs1014958	cg14771419	0.2	72.74	0
rs7811467	cg00413030	-0.18	-65.07	0
rs7811473	cg00413030	-0.18	-68.77	0
rs13254579	cg12060669	0.29	85.86	0
rs10095102	cg12060669	0.29	91.07	0
rs4503107	cg12060669	0.29	92.11	0
rs4503108	cg12060669	0.29	92.11	0
rs4637839	cg12060669	0.28	72.01	0
rs4355775	cg12060669	0.28	72.41	0
rs4352862	cg12060669	0.29	92.87	0
rs4506224	cg12060669	0.29	75.24	0
rs12543320	cg12060669	0.29	94	0
rs12545069	cg12060669	0.29	90.72	0
rs12542782	cg12060669	0.29	90.72	0
rs13280859	cg12060669	0.28	65.91	0
rs12543367	cg12060669	0.29	93.78	0
rs12386863	cg12060669	0.29	76.77	0
rs7821729	cg12060669	0.29	99.78	0
rs13272093	cg12060669	0.29	75.49	0
rs4871864	cg12060669	0.29	92.68	0
rs4871865	cg12060669	0.29	92.68	0
rs4872105	cg12060669	0.28	67.41	0
rs4872106	cg12060669	0.29	94.13	0
rs9792292	cg12060669	0.29	94.13	0
rs9792290	cg12060669	0.29	93.98	0
rs4345565	cg12060669	0.29	94.95	0
rs4524801	cg12060669	0.29	94.95	0
rs4641073	cg12060669	0.29	94.95	0
rs4313166	cg12060669	0.29	94.95	0
rs4425760	cg12060669	0.29	92.8	0
rs4524802	cg12060669	0.29	76.81	0
rs4554472	cg12060669	0.29	76.81	0
rs4515555	cg12060669	0.29	94.95	0
rs4501584	cg12060669	0.29	93.98	0
rs4291277	cg12060669	0.29	93.32	0
rs10097087	cg12060669	0.29	77.19	0
rs10087348	cg12060669	0.29	75.5	0
rs10098047	cg12060669	0.29	81.26	0
rs7012666	cg12060669	0.29	75.69	0
rs7012848	cg12060669	0.29	78.37	0
rs12544204	cg02168270	0.46	74	0
rs34364442	cg02168270	0.46	84.19	0
rs62508987	cg02168270	0.46	94.53	0
rs35326477	cg02168270	0.46	96.08	0
rs12544867	cg02168270	0.46	96.08	0
rs12544217	cg02168270	0.46	96.08	0
rs34773335	cg02168270	0.46	96.08	0
rs7846692	cg02168270	0.46	96.08	0
rs62508995	cg02168270	0.46	96.08	0
rs12550573	cg02168270	0.46	96.08	0
rs59253259	cg02168270	0.46	96.08	0
rs1509088	cg02168270	0.46	96.08	0
rs13282767	cg02168270	0.46	96.08	0
rs4873320	cg02168270	0.46	88.37	0
rs7008023	cg02168270	0.46	96.08	0
rs12235015	cg02168270	0.46	96.08	0
rs4515564	cg02168270	0.46	96.08	0
rs13277584	cg02168270	0.46	96.08	0
rs12235089	cg02168270	0.46	96.08	0
rs6991369	cg02168270	0.46	96.08	0
rs62509008	cg02168270	0.44	64.46	0
rs34681969	cg02168270	0.46	94.4	0
rs17718911	cg02168270	0.46	96.08	0
rs2385326	cg02168270	0.46	96.08	0
rs4242453	cg02168270	0.46	96.08	0
rs13277191	cg02168270	0.46	96.08	0
rs4873329	cg02168270	0.46	96.08	0
rs13253696	cg02168270	0.46	96.08	0
rs4617168	cg02168270	0.46	96.08	0
rs2170189	cg02168270	0.46	94.89	0
rs2046075	cg02168270	0.46	95.96	0
rs4509345	cg02168270	0.46	95.96	0
rs150026370	cg02168270	0.46	93.45	0
rs140087585	cg02168270	0.46	93.45	0
rs79939489	cg02168270	0.46	95.3	0
rs28657847	cg02168270	0.46	88.78	0
rs35739899	cg02168270	0.46	88.78	0
rs2385233	cg02168270	0.46	88.78	0
rs715906	cg02168270	0.46	88.78	0
rs13277298	cg02168270	0.46	88.78	0
rs35892058	cg02168270	0.46	88.78	0
rs11780058	cg02168270	0.46	88.78	0
rs1384804	cg03983883	0.26	97.45	0
rs10093654	cg03983883	0.26	97.45	0
rs10093797	cg03983883	0.26	97.45	0
rs3808619	cg03983883	0.26	103.11	0
rs13269243	cg03983883	0.25	78.02	0
rs7839152	cg03983883	0.25	79.41	0
rs28429528	cg03983883	0.25	79.42	0
rs9298316	cg03983883	0.25	79.41	0
rs7842142	cg03983883	0.25	79.41	0
rs11785966	cg03983883	0.25	79.41	0
rs2369442	cg03983883	0.25	79.41	0
rs10111625	cg03983883	0.25	79.41	0
rs10092335	cg03983883	0.25	79.41	0
rs10112388	cg03983883	0.25	79.41	0
rs6980663	cg03983883	0.25	79.41	0
rs7001074	cg03983883	0.25	79.41	0
rs1054283	cg03983883	0.25	79.41	0
rs7010897	cg03983883	0.25	79.41	0
rs11986947	cg03983883	0.25	79.41	0
rs2369440	cg03983883	0.25	79.41	0
rs2717539	cg03983883	0.25	79.41	0
rs2625664	cg03983883	0.25	79.41	0
rs1026920	cg03983883	0.25	78.02	0
rs2717538	cg03983883	0.25	78.02	0
rs2046339	cg03983883	0.25	76.92	0
rs1441438	cg03983883	0.25	76.86	0
rs1545228	cg03983883	0.25	72.53	0
rs894221	cg03983883	0.25	76.92	0
rs2919932	cg03983883	0.25	76.92	0
rs1441850	cg03983883	0.25	76.92	0
rs2453645	cg00191853	0.24	64.15	0
rs2453647	cg00191853	0.24	64.15	0
rs2453648	cg00191853	0.24	64.15	0
rs2248768	cg00191853	0.24	64.42	0
rs2248767	cg00191853	0.24	64.42	0
rs2514693	cg00191853	0.24	64.07	0
rs4236763	cg07217150	-0.28	-83.09	0
rs7831714	cg07217150	-0.28	-84.82	0
rs931812	cg07217150	-0.28	-95.11	0
rs2102290	cg07217150	-0.28	-95.44	0
rs1384804	cg21140145	0.19	83.73	0
rs10093654	cg21140145	0.19	83.73	0
rs10093797	cg21140145	0.19	83.73	0
rs3808619	cg21140145	0.2	86.89	0
rs13269243	cg21140145	0.19	72.99	0
rs7839152	cg21140145	0.19	74.15	0
rs28429528	cg21140145	0.19	74.16	0
rs9298316	cg21140145	0.19	74.15	0
rs7842142	cg21140145	0.19	74.15	0
rs11785966	cg21140145	0.19	74.15	0
rs2369442	cg21140145	0.19	74.15	0
rs10111625	cg21140145	0.19	74.15	0
rs10092335	cg21140145	0.19	74.15	0
rs10112388	cg21140145	0.19	74.15	0
rs6980663	cg21140145	0.19	74.15	0
rs7001074	cg21140145	0.19	74.15	0
rs1054283	cg21140145	0.19	74.15	0
rs7010897	cg21140145	0.19	74.15	0
rs11986947	cg21140145	0.19	74.15	0
rs2369440	cg21140145	0.19	74.15	0
rs2717539	cg21140145	0.19	74.15	0
rs2625664	cg21140145	0.19	74.15	0
rs1026920	cg21140145	0.19	72.99	0
rs2717538	cg21140145	0.19	72.99	0
rs2046339	cg21140145	0.19	71.88	0
rs1441438	cg21140145	0.19	71.89	0
rs1545228	cg21140145	0.19	68.52	0
rs894221	cg21140145	0.19	71.88	0
rs2919932	cg21140145	0.19	71.88	0
rs1441850	cg21140145	0.19	71.88	0
rs10100064	cg10066109	0.25	74.57	0
rs28657963	cg10066109	0.25	74.26	0
rs12547857	cg10066109	0.25	74.57	0
rs731156	cg10066109	0.25	74.57	0
rs6469071	cg10066109	0.25	74.57	0
rs7842445	cg10066109	0.25	74.57	0
rs2167799	cg10066109	0.25	74.57	0
rs2123543	cg10066109	0.25	74.57	0
rs2123542	cg10066109	0.25	73.82	0
rs2167798	cg10066109	0.25	74.57	0
rs28373035	cg10066109	0.25	74.57	0
rs13270670	cg10066109	0.25	74.57	0
rs28523747	cg10066109	0.25	74.57	0
rs28551523	cg10066109	0.25	74.57	0
rs28620840	cg10066109	0.25	74.49	0
rs13280788	cg10066109	0.25	74.57	0
rs13279442	cg10066109	0.25	74.57	0
rs13279066	cg10066109	0.25	74.57	0
rs11998575	cg10066109	0.25	74.57	0
rs11994811	cg10066109	0.25	73.94	0
rs4436099	cg10066109	0.25	74.57	0
rs10955424	cg10066109	0.25	74.57	0
rs28562014	cg10066109	0.25	74.57	0
rs10102666	cg10066109	0.25	74.57	0
rs10092860	cg10066109	0.25	74.57	0
rs16874615	cg10066109	0.25	74.36	0
rs16874617	cg10066109	0.25	74.57	0
rs59746221	cg10066109	0.25	74.57	0
rs7845625	cg10066109	0.25	74.57	0
rs7828387	cg10066109	0.25	74.57	0
rs7828143	cg10066109	0.25	74.57	0
rs7828149	cg10066109	0.25	74.57	0
rs7828307	cg10066109	0.25	74.57	0
rs7812434	cg10066109	0.25	74.57	0
rs1453217	cg10066109	0.25	74.57	0
rs1453216	cg10066109	0.25	74.57	0
rs10216339	cg10066109	0.25	74.57	0
rs28651376	cg10066109	0.25	74.57	0
rs2167800	cg10066109	0.25	74.57	0
rs7009264	cg10066109	0.25	74.57	0
rs16874643	cg10066109	0.25	74.57	0
rs2458427	cg15084585	0.34	64.16	0
rs2514761	cg16306629	0.27	111.42	0
rs73643019	cg06422353	-0.3	-76.63	0
rs7029383	cg06422353	-0.3	-89.54	0
rs7854466	cg08167410	0.29	83.73	0
rs1969992	cg08167410	0.3	102.98	0
rs2988011	cg08167410	0.3	102.98	0
rs2988012	cg08167410	0.3	100.4	0
rs3013743	cg08167410	0.29	80.92	0
rs7860513	cg15138245	0.23	64.9	0
rs7019881	cg13837146	0.2	73.52	0
rs8176751	cg12020464	-0.15	-73.01	0
rs7853989	cg12020464	-0.15	-68.42	0
rs7855255	cg12020464	-0.15	-68.76	0
rs8176733	cg12020464	-0.15	-68.76	0
rs2073823	cg12020464	-0.15	-68.76	0
rs8176730	cg12020464	-0.15	-68.76	0
rs8176725	cg12020464	-0.15	-65.74	0
rs9423584	cg08977827	-0.25	-74.91	0
rs7902970	cg21641816	-0.14	-73.66	0
rs60097806	cg21641816	-0.14	-73.66	0
rs11252689	cg21641816	-0.14	-72.42	0
rs11817623	cg21641816	-0.14	-72.25	0
rs60704781	cg21641816	-0.14	-65.6	0
rs57782226	cg21641816	-0.14	-64.49	0
rs1763406	cg07158320	-0.26	-72.85	0
rs2783613	cg07158320	-0.25	-69.82	0
rs2783612	cg07158320	-0.25	-69.82	0
rs1148177	cg09294573	0.28	69.84	0
rs915209	cg09294573	0.29	94.98	0
rs1249348	cg09294573	0.29	94.98	0
rs1273097	cg09294573	0.29	94.98	0
rs1148178	cg09294573	0.29	94.98	0
rs1148179	cg09294573	0.29	94.98	0
rs1148180	cg09294573	0.29	94.98	0
rs1148181	cg09294573	0.29	94.98	0
rs1148182	cg09294573	0.29	94.98	0
rs2807742	cg11671940	0.29	65.05	0
rs2767702	cg13562929	-0.19	-65.29	0
rs2692771	cg13562929	-0.19	-65.32	0
rs10796127	cg26708920	0.37	144.21	0
rs12766391	cg09533556	0.24	86.42	0
rs34449737	cg14418922	-0.23	-67.61	0
rs807019	cg02932204	0.27	98.41	0
rs1330865	cg01780345	0.27	89.97	0
rs7087640	cg01780345	0.26	65.8	0
rs11190581	cg07570687	0.14	68.2	0
rs1006368	cg00809775	0.14	67.31	0
rs4962681	cg00809775	0.14	67.31	0
rs7093768	cg00809775	0.14	66.19	0
rs2885521	cg00809775	0.14	65.87	0
rs11245329	cg00809775	0.14	64.37	0
rs9418691	cg06406458	-0.35	-111.59	0
rs9418691	cg19572051	-0.25	-67.92	0
rs3923974	cg23771949	-0.24	-99.59	0
rs7098749	cg23771949	-0.24	-97.7	0
rs7090409	cg23771949	-0.24	-91.36	0
rs56678407	cg23771949	-0.24	-97.69	0
rs885412	cg07243930	-0.26	-65.09	0
rs73424284	cg07243930	-0.27	-78.61	0
rs17173896	cg07243930	-0.27	-79.95	0
rs2271581	cg07243930	-0.27	-74.24	0
rs2271580	cg07243930	-0.27	-77.6	0
rs7123007	cg07243930	-0.27	-77.6	0
rs7123156	cg07243930	-0.27	-77.6	0
rs7109345	cg07243930	-0.27	-76.34	0
rs7124400	cg07243930	-0.27	-78.46	0
rs12798300	cg07243930	-0.27	-73.31	0
rs113734313	cg07243930	-0.27	-71.88	0
rs58655904	cg07398106	-0.35	-66.92	0
rs4757655	cg07398106	-0.35	-71.23	0
rs4757656	cg07398106	-0.35	-71.23	0
rs74915858	cg07398106	-0.35	-71.23	0
rs112149204	cg07398106	-0.35	-71.23	0
rs150597811	cg07398106	-0.35	-71.23	0
rs139914313	cg07398106	-0.35	-71.23	0
rs4757660	cg07093428	-0.34	-75.48	0
rs4757660	cg07398106	-0.35	-85.82	0
rs11605386	cg07093428	-0.34	-77.59	0
rs11605386	cg07398106	-0.35	-87.03	0
rs77724297	cg07398106	-0.35	-68.62	0
rs56242938	cg07398106	-0.35	-68.62	0
rs56033711	cg07398106	-0.35	-68.62	0
rs78454952	cg07398106	-0.35	-68.62	0
rs4757660	cg11821245	-0.42	-65.97	0
rs11605386	cg11821245	-0.42	-66.66	0
rs4757660	cg14332815	-0.37	-72.36	0
rs11605386	cg14332815	-0.37	-73.15	0
rs4757655	cg19767548	-0.35	-66.55	0
rs4757656	cg19767548	-0.35	-66.55	0
rs74915858	cg19767548	-0.35	-66.55	0
rs112149204	cg19767548	-0.35	-66.55	0
rs150597811	cg19767548	-0.35	-66.55	0
rs139914313	cg19767548	-0.35	-66.55	0
rs4757660	cg19767548	-0.35	-84.14	0
rs11605386	cg19767548	-0.36	-86.6	0
rs77724297	cg19767548	-0.35	-65.23	0
rs56242938	cg19767548	-0.35	-65.23	0
rs56033711	cg19767548	-0.35	-65.23	0
rs78454952	cg19767548	-0.35	-65.23	0
rs11231107	cg03781663	0.35	79.42	0
rs17157332	cg03781663	0.35	81.1	0
rs4124	cg03781663	0.35	81.1	0
rs17157338	cg03781663	0.35	79.89	0
rs11822224	cg03781663	0.35	81.1	0
rs11827029	cg03781663	0.35	81.1	0
rs7946258	cg03781663	0.35	81.1	0
rs12273757	cg03781663	0.35	81.1	0
rs12273761	cg03781663	0.35	81.1	0
rs113522729	cg03781663	0.35	81.1	0
rs11819950	cg03781663	0.35	79.23	0
rs56973213	cg03781663	0.35	78.47	0
rs12291022	cg03781663	0.35	78.47	0
rs57973105	cg03781663	0.35	78.5	0
rs7929818	cg03781663	0.35	77.61	0
rs11231108	cg03781663	0.35	76.69	0
rs11231109	cg03781663	0.35	76.69	0
rs12294680	cg03781663	0.35	76.69	0
rs11231110	cg03781663	0.35	76.69	0
rs12271287	cg03781663	0.35	76.69	0
rs11231112	cg03781663	0.35	76.69	0
rs11826756	cg03781663	0.35	76.69	0
rs370915611	cg03781663	0.35	76.69	0
rs12289932	cg03781663	0.35	75.56	0
rs73500219	cg03781663	0.35	71.38	0
rs75822310	cg03781663	0.35	71.38	0
rs35117866	cg03781663	0.35	71.38	0
rs12273682	cg03781663	0.34	70.47	0
rs11231115	cg03781663	0.35	75.46	0
rs11231116	cg03781663	0.35	75.46	0
rs3867144	cg03781663	0.35	72.07	0
rs583887	cg03887787	0.11	64.78	0
rs596002	cg03887787	0.11	64.78	0
rs1204650	cg03887787	0.11	64.51	0
rs1151519	cg03887787	0.11	63.92	0
rs601863	cg03887787	0.11	64.51	0
rs658524	cg03887787	0.11	64.78	0
rs645900	cg03887787	0.11	64.51	0
rs687672	cg03887787	0.11	64.81	0
rs658938	cg03887787	0.11	64.22	0
rs568617	cg03887787	0.11	64.51	0
rs694994	cg03887787	0.11	64.22	0
rs677931	cg03887787	0.11	63.95	0
rs693824	cg03887787	0.11	63.95	0
rs641018	cg03887787	0.11	63.95	0
rs7950463	cg12062782	0.22	92.64	0
rs692892	cg24851651	-0.43	-168.74	0
rs498045	cg24851651	-0.43	-160.92	0
rs34900764	cg24851651	-0.43	-124.12	0
rs4945097	cg16098618	-0.31	-113.05	0
rs2726908	cg13714644	0.24	73.44	0
rs1365047	cg13714644	0.24	72.48	0
rs2726913	cg13714644	0.24	74.71	0
rs2726914	cg13714644	0.24	75.54	0
rs2726915	cg13714644	0.24	75.62	0
rs2726916	cg13714644	0.24	75.62	0
rs2042678	cg13714644	0.24	75.62	0
rs2553756	cg13714644	0.24	75.62	0
rs2553757	cg13714644	0.24	69.64	0
rs2726919	cg13714644	0.24	74.43	0
rs1365046	cg13714644	0.24	73.21	0
rs2726920	cg13714644	0.24	73.77	0
rs2553758	cg13714644	0.24	75.62	0
rs2553760	cg13714644	0.24	73.02	0
rs2553761	cg13714644	0.24	72.65	0
rs11055602	cg07195891	-0.29	-66.18	0
rs7960410	cg07195891	-0.28	-63.78	0
rs6488618	cg07195891	-0.28	-65.32	0
rs12310416	cg07195891	-0.29	-74.61	0
rs7311218	cg16483163	0.2	76.06	0
rs7978842	cg21924631	0.36	66.91	0
rs4763827	cg21924631	0.36	69.43	0
rs1861674	cg21924631	0.36	69.1	0
rs7134787	cg21924631	0.36	70.86	0
rs60022096	cg21924631	0.35	69.11	0
rs7957014	cg21924631	0.35	69.11	0
rs7975061	cg21924631	0.36	80.67	0
rs7969931	cg11595855	0.19	74.22	0
rs784894	cg18048620	0.14	74.86	0
rs1565170	cg21174793	-0.41	-95.84	0
rs1565171	cg21174793	-0.41	-93.24	0
rs1565172	cg21174793	-0.41	-95.84	0
rs10876679	cg21174793	-0.41	-91.31	0
rs7315419	cg21174793	-0.41	-96.26	0
rs2046686	cg21174793	-0.41	-98.21	0
rs705699	cg18193195	-0.16	-69.74	0
rs17099260	cg04928577	-0.26	-67.58	0
rs7976927	cg04928577	-0.25	-64.18	0
rs2302902	cg00418190	-0.32	-91.17	0
rs4762139	cg00418190	-0.32	-96.18	0
rs7973062	cg00481382	-0.24	-71.36	0
rs10777822	cg00481382	-0.24	-68.72	0
rs10431438	cg00481382	-0.24	-69.46	0
rs7296608	cg00481382	-0.24	-69.46	0
rs249571	cg00481382	-0.24	-69.52	0
rs249568	cg00481382	-0.24	-66.72	0
rs10745704	cg08922308	-0.29	-83.89	0
rs7963489	cg08922308	-0.28	-74.26	0
rs10777636	cg08922308	-0.28	-73.33	0
rs11107749	cg08922308	-0.28	-73.33	0
rs7973062	cg23174406	-0.26	-79.47	0
rs10777822	cg23174406	-0.26	-75.42	0
rs10431438	cg23174406	-0.25	-76.63	0
rs7296608	cg23174406	-0.25	-76.63	0
rs249571	cg23174406	-0.25	-76.76	0
rs249568	cg23174406	-0.25	-71.96	0
rs3885907	cg14799392	-0.18	-67.05	0
rs11147624	cg19272349	0.2	65.73	0
rs11147625	cg19272349	0.2	65.73	0
rs11147626	cg19272349	0.2	65.48	0
[truncated: 386,611+ more rows]
